1 **10 years of EPOC: A scoping review of Emotiv's portable EEG device**

2

3 Nikolas S Williams<sup>1</sup>, Genevieve M McArthur<sup>1</sup>, Nicholas A Badcock<sup>1,2</sup>

4 <sup>1</sup>Department of Cognitive Science, Macquarie University, Sydney, NSW, Australia

5 <sup>2</sup>School of Psychological Science, University of Western Australia, Perth, WA,

6 Australia

7

8

9 Corresponding Author:

10 Nikolas S. Williams<sup>1</sup>

11 Australian Hearing Hub 16 University Avenue Level 3

12 Macquarie University, NSW 2109

13 Email address: [nikolas.williams@mq.edu.au](mailto:nikolas.williams@mq.edu.au)

14

15 **Abstract**

16 **BACKGROUND:** Commercially-made low-cost electroencephalography (EEG)  
17 devices have become increasingly available over the last decade. One of these  
18 devices, Emotiv EPOC, is currently used in a wide variety of settings, including brain-  
19 computer interface (BCI) and cognitive neuroscience research.

20 **PURPOSE:** The aim of this study was to chart peer-reviewed reports of Emotiv  
21 EPOC projects to provide an informed summary on the use of this device for  
22 scientific purposes.

23 **METHODS:** We followed a five-stage methodological framework for a scoping  
24 review that included a systematic search using the Preferred Reporting Items for  
25 Systematic Reviews and Meta-Analyses Extension for Scoping Reviews (PRISMA-  
26 ScR) guidelines. We searched the following electronic databases: PsychINFO,  
27 MEDLINE, Embase, Web of Science, and IEEE Xplore. We charted study data  
28 according to application (BCI, clinical, signal processing, experimental research, and  
29 validation) and location of use (as indexed by the first author's address).

30 **RESULTS:** We identified 382 relevant studies. The top five publishing countries  
31 were the United States (n = 35), India (n = 25), China (n = 20), Poland (n = 17), and  
32 Pakistan (n = 17). The top five publishing cities were Islamabad (n = 11), Singapore  
33 (n = 10), Cairo, Sydney, and Bandung (n = 7 each). Most of these studies used  
34 Emotiv EPOC for BCI purposes (n = 277), followed by experimental research (n =  
35 51). Thirty-one studies were aimed at validating EPOC as an EEG device and a  
36 handful of studies used EPOC for improving EEG signal processing (n = 12) or for  
37 clinical purposes (n = 11).

38 **CONCLUSIONS:** In its first 10 years, Emotiv EPOC has been used around the world  
39 in diverse applications, from control of robotic limbs and wheelchairs to user

40 authentication in security systems to identification of emotional states. Given the  
41 widespread use and breadth of applications, it is clear that researchers are  
42 embracing this technology.

43

44

## Introduction

45           Electroencephalography (EEG) is a continuous recording of the electrical  
46 activity generated by groups of neurons firing in the brain. An EEG typically  
47 comprises recordings of activity present at multiple sites on the head, indexed using  
48 metal electrodes placed on the scalp. EEG recordings can be inspected by sight for  
49 signs of brain dysfunction (e.g., epilepsy), or can be processed to produce spectral  
50 analyses of the electrical activity over a period of time, and event-related potentials  
51 (ERPs) that reflect the average pattern of electrical activity generated by a particular  
52 stimulus (e.g., a speech sound, a face, a written word).

53           EEG is one of the oldest neuroscientific techniques in use today. Since the  
54 first human recordings published by Hans Berger in 1929 [see 1, for a history], EEG  
55 has become a popular tool for neuroscientists due to its non-invasive nature and  
56 high temporal resolution. The technique has matured over the decades due to  
57 advances in technology, which has allowed for greater instrument sensitivity and  
58 better signal processing techniques. What used to be analogue signals scribed onto  
59 rolls of paper are now digital recordings stored on hard drives, ready for processing  
60 using a myriad statistical and mathematical techniques.

61           In recent years, one of the biggest evolutions in EEG applications has been  
62 the development of consumer-grade devices. Not only do these devices make  
63 acquiring EEG signals easier, but they can do so in natural environments outside the  
64 traditional laboratory setting. In 2009, a biotech company, Emotiv Systems, released  
65 EPOC, a consumer-oriented EEG device. EPOC was originally designed and  
66 marketed as a hands-free videogame device, placing it within the class of brain-  
67 computer interface (BCI) devices. As one of the first EEG devices available to  
68 consumers, EPOC's release demonstrated the feasibility of low-cost neuroimaging

69 outside of research laboratories. The next 10 years saw the EPOC developer re-  
70 established as Emotiv Inc., a second iteration of the device called EPOC+, and the  
71 market of EPOC evolve to include research applications. Neuroscientists, keen to  
72 take advantage of efficiency increases and budget decreases, saw an opportunity in  
73 EPOC for user-friendly research at a fraction of the cost of traditional research-grade  
74 EEG systems.

75 In the decade since its release, EPOC has been used in hundreds of scientific  
76 applications as its ease of setup and low price-point make it an appealing option for  
77 researchers and engineers. The first published works using EPOC appeared in  
78 2010, describing the use of EPOC in BCI applications [2-4]. In 2011, the first study  
79 using for experimental research was published [5]. Two years later, studies  
80 validating the use of EPOC in experimental research began to emerge [6-8]. In the  
81 years that followed, EPOC appeared in many conference proceedings and journal  
82 articles, suggesting its wide adoption as an EEG device. In our laboratory, we have  
83 successfully converted the EPOC into an ERP device, which we have validated  
84 against a research-grade system [8-10]. In addition, our department has integrated  
85 EPOC into the Bachelor of Cognitive and Brain Sciences as a practical  
86 demonstration of neuroscience methodology [11].

87 Given the demonstrated validity of the EPOC as a research tool, as well as its  
88 low cost, researchers around the world are understandably curious about what the  
89 EPOC system can and cannot be used for. This has inspired a number of reviews of  
90 EPOC's use in specific domains such as BCI [12-17], cognitive enhancement [18,  
91 19], stress detection [20], and education [21]. However, no review has considered  
92 the use of the EPOC across multiple domains. In addition, while other reviews have

93 focused on portable EEG devices in general [22-26], none have focused on the  
94 EPOC device specifically.

95 With this gap in knowledge in mind, we aimed to carry out a scoping review of  
96 studies that have used the EPOC as an EEG and ERP device to understand the use  
97 and location of EPOC research to date. We followed the framework put forth by  
98 Arksey and O'Malley (27 p. 21) for conducting a scoping review, where, in contrast to  
99 a systematic review, a scoping review does not seek to answer a narrowly-defined  
100 research question but to examine and describe the “extent, range, and nature of  
101 research activity”. We followed the five stages described by Arksey and O'Malley  
102 (27), which were:

103 Stage 1: identifying the research question.

104 Stage 2: identifying relevant studies.

105 Stage 3: study selection.

106 Stage 4: charting the data.

107 Stage 5: collating, summarising, and reporting the results.

108 Additionally, we followed the Preferred Reporting Items for Systematic  
109 Reviews and Meta-analyses Extension for Scoping Reviews (PRISMA-ScR)  
110 guidelines [28]. See supporting information (S1 PRISMA-ScR) for the checklist.

### 111 **Stage 1: Identifying the Research Question**

112 We sought to answer the question of where (i.e., locations) and how (i.e.,  
113 applications) EPOC has been used in research settings. In addressing this question,  
114 we aim to facilitate decision-making about EPOC useability and expect this review  
115 may be particularly beneficial for researchers who are searching for inexpensive  
116 neuroscience techniques. It may also be useful for clinicians in the development of  
117 BCI-assisted technologies that support people with physical limitations.



142 **Fig 1. Preferred Reporting Items for Systematic Reviews and Meta-analyses**  
143 **(PRISMA) flowchart.**

144 **Stage 3: Study Selection**

145 We excluded twenty-two records for which the full-text could not be retrieved  
146 and screened the remaining articles according to the following eligibility criteria: (1)  
147 EPOC device used; (2) Actual data collected; (3) Articles published in peer-reviewed  
148 journals or conference proceedings. We removed seventy-one studies that failed at  
149 least one of these criteria. These included publications in which EPOC appeared as  
150 the acronym for *Effective Practice and Organisation of Care*, in which no actual EEG  
151 data was collected, which were not written in English, or were literature reviews.

152 The final number of studies included in this review was 382. Of these, 252  
153 were conference proceedings and 130 were journal articles. As the conference  
154 proceedings in this review meet the criteria of peer review, we did not distinguish  
155 between conference proceedings and journal articles. However, Fig 2 provides a  
156 breakdown of the types of studies over the years included in this review.

157 **Fig 2. Number of EPOC studies by type from 2010 to 2019.**

158 **Stage 4: Charting the data**

159 We charted the data by recording relevant information from each record. This  
160 information included the author(s), year of publication, study location, and aims of  
161 the study. We classified each study according to its aim into one of five categories:  
162 (1) EPOC used as a BCI device (e.g., control of a wheel chair); (2) EPOC used as a  
163 clinical tool (e.g., to assess depression); (3) EPOC used to collect EEG data for  
164 developing or refining EEG signal processing techniques (e.g., to reduce artefacts in  
165 EEG data streams); (4) EPOC used as a theory development tool (e.g., to examine



166 EEG signatures in cognitive tasks); and (5) studies aimed at validating EPOC as an  
167 EEG device (e.g., comparing EPOC to research-grade EEG systems). See Table 1  
168 for descriptions and number of studies assigned to each category.

169 **Table 1. Category descriptions and counts of EPOC-related studies**

| Category                 | Description                                                                                               | Conference proceedings | Journal articles | Total |
|--------------------------|-----------------------------------------------------------------------------------------------------------|------------------------|------------------|-------|
| Brain-computer interface | Studies that used EPOC as a means of interacting with a computer or a machine.                            | 212                    | 65               | 277   |
| Clinical                 | Studies that used EPOC as a diagnostic or therapeutic device.                                             | 3                      | 8                | 11    |
| Signal Processing        | Studies that used EPOC to collect data to develop or refine EEG signal processing or analysis techniques. | 7                      | 5                | 12    |
| Experimental Research    | Studies that used EPOC to collect EEG data to answer a neuroscience research question or hypothesis.      | 21                     | 30               | 51    |
| Validation               | Studies that investigated whether EPOC was a valid EEG device.                                            | 14                     | 17               | 31    |

170

171 To chart the location of EPOC studies, we used the first authors'  
172 corresponding address. To visualise the global distribution of EPOC studies, we  
173 obtained latitude and longitude coordinates from a world cities database  
174 (<https://simplemaps.com/data/world-cities>). If cities did not have coordinate  
175 information in the database, we performed a Google search and entered the  
176 coordinates manually. See supporting information (S2 Appendix) for data extracted  
177 and charted.

178                   **Stage 5: Collating, Summarising, and Reporting the Results**

179                   The first three EPOC-related studies were published in the year after its  
180 release, 2010. These initial studies were all related to BCI: two P300 classification  
181 studies [2, 4] and a robotic arm control study [3]. A year later, 2011, saw the first  
182 study published using EPOC for experimental research [5]. This study examined the  
183 relationship between EEG, personality, and mood on perceived engagement. The  
184 first publications aimed at validating EPOC appeared in 2013 [6-8, 29, 30].

185                   Overall, the number of EPOC studies showed a steady increase from 2010 (n  
186 = 3) to 2015 (n = 61), after which the numbers fell to 58, 59 and 44 in 2016, 2017,  
187 and 2018 respectively, and then increased to 52 publications in 2019 (see Fig 3).  
188 While the true reason for this pattern is unknown, it may well reflect a change in the  
189 licensing of Emotiv software, which switched to a subscription-based license in 2016  
190 (previously the license involved a one-time fee). This increased the cost of the EPOC  
191 for research, which may explain the declining in publications in 2015 – 2018. The  
192 resurgence in 2019 could be acceptance of the licensing fee as the new standard  
193 and being factored into budgets and grant applications. It remains to be seen how  
194 this fee structure will impact EPOC use in the future.

195                   **Fig 3. Number of EPOC studies from 2010 to 2019 by study application.**

## 196 **Location**

197 In the years 2009 to 2019, the five countries that published the most EPOC  
198 studies were the United States (n = 35), India (n = 25), China (n = 20), Poland (n =  
199 17), and Pakistan (n = 17). The five individual cities that published the most EPOC  
200 studies were Islamabad (n = 11), Singapore (n = 10), Bandung, Indonesia (n = 7),  
201 Cairo (n = 7), and Sydney (n = 7). See Fig 4 for overall global distribution of studies  
202 covered by this systematic review.

## 203 **Fig 4. Global distribution of EPOC studies from 2010 to 2019.**

## 204 **Applications**

205 **BCI.** BCI applications represented the majority of EPOC studies  
206 (approximately 73% of studies in this review). To better characterise BCI studies, we  
207 further classified them into four subcategories: (a) biometrics, (b) device control, and  
208 (c) state recognition, and (c) general classification. See Table 2 for description of  
209 each subcategory.

## 210 **Table 2. Descriptions and study counts of EPOC-related BCI subcategories.**

| BCI Subcategory        | Description                                                                                                                                                               | Study count |
|------------------------|---------------------------------------------------------------------------------------------------------------------------------------------------------------------------|-------------|
| Biometrics             | Studies that used EPOC to characterise EEG signatures for identification/authentication of individual users.                                                              | 11          |
| Device control         | Studies that used EPOC to enable control of devices in an individual's environment (e.g., wheelchairs, appliances).                                                       | 97          |
| State recognition      | Studies that used EPOC to recognise human physical, mental, or affective states.                                                                                          | 94          |
| General classification | Studies that used EPOC to collect EEG data for the classification of EEG signatures, without explicit applications associated with other BCI subcategories in this table. | 75          |

211

212 **BCI biometrics.** Much like a fingerprint or a password, individual brain  
213 signatures can identify individuals, granting them access to systems or facilities. As  
214 the variation between individuals' brain waves can be quite complex, the use of

215 individual EEG signatures as a biometric indicator represents a promising application  
216 of portable EEG technology. A total of 11 studies used EPOC to investigate EEG in  
217 the context of user-authentication and security. The earliest biometric EPOC study  
218 was published in 2013 and used a P300 speller paradigm to investigate the  
219 feasibility of using EEG classification for user authentication [31]. Recently, study  
220 designs and classification methods have grown more sophisticated. For example,  
221 Moctezuma, Torres-Garcia (32) used feature extraction and classification to  
222 distinguish between individuals' EEG signatures while they imagined speaking  
223 words. Likewise, Seha and Hatzinakos (33) also employed feature extraction, in this  
224 case on auditory evoked potentials, to accurately (> 95%) discriminate between  
225 individuals. Compared to BCI studies in general, relatively few EPOC studies have  
226 focused on biometry. Nevertheless, there has been a general increase in biometric  
227 studies since 2013 and this field represents one of the many practical applications of  
228 portable EEG technology.

229 **BCI device control.** The control of external devices, such as prostheses or  
230 wheelchairs, is the most straightforward application of EEG-based BCIs. A total of 97  
231 studies, representing 35% of BCI studies and 25% of studies overall, used EPOC as  
232 a means of controlling or interacting with machines in users' environment. P300  
233 spellers are perhaps the most well-known type of BCI interface that fall under this  
234 category. P300 speller interfaces exploit the well-documented and robust signature  
235 observed as deflection in an ERP waveform in a response to a target stimulus. By  
236 capitalising on the P300, a computer can detect when a target letter flashes on a  
237 screen thereby allowing selection of letters without physical interaction. Though there  
238 were several EPOC studies in this review that investigated traditional P300 speller  
239 BCI interfaces [34-37], others harnessed P300 for such purposes as interacting with

240 navigation systems [38] and robotic devices [39]. Suhas, Dhal (40) investigated  
241 using ERPs to control a light bulb and a fan, with an eye towards giving physically  
242 disabled individuals control of ‘smart’ appliances. Other studies have employed  
243 EPOC as a means of controlling robots [41-47], tractors [48], and drones [49].  
244 Practical and effective BCI device control using EEG has the potential to benefit a  
245 large population, such as individuals who have lost the use of motor functions. For  
246 this reason, this area of research has received much attention and it should be  
247 expected to continue to do so.

248 **BCI state recognition.** Characterising and identifying cognitive or affective  
249 states using EEG is critical for many BCI paradigms and is a hallmark of  
250 neurofeedback applications. Many researchers have used EPOC to achieve this. For  
251 example, an early EPOC study attempted to recognise EEG patterns when  
252 participants imagined pictures [50]. More recent studies have used sophisticated  
253 algorithms to identify cognitive states, such as confusion [51], fatigue [52] and  
254 emotions [53-55]. Identifying an individual’s mental state can help to improve human  
255 performance in demanding situations. For example, Binias, Myszor (56) used an  
256 EPOC to develop algorithms aimed at helping pilots respond more quickly to  
257 unanticipated events. Studies like these demonstrate that the rapid and accurate  
258 identification of cognitive and affective states, even before conscious recognition,  
259 may lead to safer roads and skies.

260 **BCI general classification.** A total of 75 BCI studies were not readily  
261 classifiable in the above subcategories as they were not concerned with a direct  
262 application of research. Rather, these studies aimed to increase the usability of BCI  
263 technology through the development and refinement of EEG classification  
264 algorithms. For example, Perez-Vidal, Garcia-Beltran (57) collected EEG data with

265 EPOC in order to determine the effectiveness of a machine-learning algorithm for  
266 correctly identifying P300 evoked potentials. In this example, direct use of the P300  
267 was not directly used for interfacing with a specific device/machine. Rather, the  
268 central focus was on the algorithm itself. We categorised these types of studies as  
269 general classification studies.

270 **Clinical.** The small form factor and ease of setup make portable EEG devices  
271 ideal for use in clinical settings in which the objective is to treat or diagnosis health  
272 conditions. Eleven studies in this review used EPOC for this purpose, with six  
273 studies aimed at using EPOC specifically for a therapeutic purpose. For example,  
274 studies have used EPOC to provide neurofeedback for motor rehabilitation [58, 59]  
275 or for the treatment of depression [60] and pain [61, 62]. Five studies used EPOC as  
276 a diagnostic tool with the aims of assessing conditions such as depression [63],  
277 attention deficit hyperactivity disorder [64, 65], or encephalopathy [66]. Yet another  
278 study used EPOC to monitor changes in the nervous system of a group of Turkish  
279 researchers who visited Antarctica [67].

280 **Signal processing.** Twelve studies in this review aimed to improve EEG  
281 signal processing techniques used with EPOC data. For example, Sinha, Chatterjee  
282 (68), Soumya, Zia Ur Rahman (69), and Jun Hou, Mustafa (70) used EPOC to test  
283 techniques aimed at reducing EEG artefacts and noise. Additionally, Moran and  
284 Soriano (71) compared different techniques for maximising EPOC EEG signal quality  
285 while Petrov, Stamenova (72) and Shahzadi, Anwar (73) investigated remote EEG  
286 transmission and processing. These studies are important as the signal-to-noise  
287 ratio of EEG can be small and techniques aimed at increasing it can broaden the  
288 utility of EEG devices. In addition, the increasingly distanced nature of research and

289 clinical diagnostics necessitates the development of effective data transmission  
290 pipelines.

291 **Experimental Research.** We identified a total of 51 experimental research  
292 studies that used EPOC incidentally to answer questions related to brain function.  
293 That is, researchers could have used any EEG device to collect data but they chose  
294 EPOC. Most of these studies were directly concerned with investigating EEG  
295 signatures related to certain processes, situations, or tasks. Many were cognitive in  
296 nature including EEG signatures related to cognitive load [74-77], alertness [78],  
297 distraction [79], learning styles [76], semantic association [80-82], and memory [83].  
298 Other studies examined EEG signatures related to perception. These included  
299 spatial perception [84], taste perception [85], olfactory perception [86], and visual  
300 perception [87, 88].

301 Studies examining social phenomena also constituted a large proportion of  
302 EPOC research projects. For example, we found studies in which EPOC was used to  
303 investigate consumer behaviour and preference [89-92]. Other socially-oriented  
304 studies examined the EEG patterns associated with conformity [93], deception [94],  
305 perception of quality, [95], and motivation and interest in an educational environment  
306 [96].

307 Researchers also used EPOC to better understand ailments or disorders.  
308 These types of studies are contrasted with those in the *clinical* category where  
309 publications were aimed at *treating* ailments or disorders, rather than *investigating*  
310 the ailments or disorders. For example, Askari, Setarehdan (97), Askari, Setarehdan  
311 (98) used the device to investigate neural connectivity in autism. Similarly, Fan,  
312 Wade (99) used EPOC to collect EEG data with the aim of building models to  
313 accurately identify cognitive and affective states in autistic individuals while driving.

314 In addition to autism, other studies examined the EEG signatures associated with  
315 bipolar disorder [100] and mild cognitive impairment [101].

316 Many research studies were more action-oriented. These types of studies  
317 used EPOC to characterise the EEG signatures associated with video games [102,  
318 103], driving [104-106], moving through urban [107] or virtual [108] environments,  
319 and performance of specialised tasks [109, 110].

320 **Validation.** Assessing the validity of a device is an important step in  
321 establishing its widespread implementation. If an EEG system cannot be  
322 demonstrated to accurately capture the data it purports to, then any conclusions  
323 drawn from this data are questionable. We identified thirty-one studies that tested the  
324 validity of EPOC as a research-grade EEG device. The first EPOC validation studies  
325 appeared in 2013. In this year there were five studies assessing the capabilities of  
326 EPOC. These studies assessed the accuracy of P300 identification [6], the validity of  
327 affect signatures [7], and whether EPOC could be used to collect valid ERPs [8, 29,  
328 30]. Another five EPOC validation studies were published in 2014 before peaking in  
329 2015 (n = 7) and then declining in 2016, 2017, 2018, and 2019 (n = 4, n = 4, n = 3,  
330 and n = 3, respectively).

331 Studies varied in both approach and intended application of the validation.  
332 Some did not use a benchmark device with which to compare EPOC. For example,  
333 Rodriguez Ortega, Rey Solaz (111) compared EPOC-captured affect signatures to  
334 those demonstrated in the literature. Another simply aimed to determine the  
335 classification accuracy of EPOC in P300 tasks [112]. However, most studies  
336 compared the EPOC to the performance of other research- or consumer-grade EEG  
337 devices. Four validation studies compared auditory ERPs between systems [8, 10,  
338 113]. Three studies compared visual ERPs between systems [9, 114 McDowell, &



339 Hairston, 2014, 115, 116]. Tello, Müller (117) also conducted a visual-related  
340 validation study in which they compared EEG device performance on steady-state  
341 visual evoked potential (SSVEP) tasks, while Szalowski and Picovici (118) tested the  
342 capacity of EPOC to distinguish between different SSVEP experimental parameters.  
343 Melnik, Legkov (119) compared the performance of multiple systems on both visual  
344 ERPs and SSVEPs. Also in the visual domain, Kotowski, Stapor (120) examined the  
345 capacity of EPOC to collect ERPs of emotional face processing. Takehara,  
346 Kayanuma (121) compared the performance of EPOC to another device on capacity  
347 to capture event-related desynchronization while Grummett, Leibbrandt (122)  
348 conducted a comprehensive validation study that compared EPOC to other devices  
349 on power spectra, ERPs, SSVEPs, and event-related  
350 desynchronization/synchronisation.

351         Some studies validated EPOC's capacity to measure cognitive indicators with  
352 one study comparing devices' capture of cognitive load signatures [123 Sinharay, &  
353 Sinha, 2014], and another comparing the performance of systems during cognitive  
354 tasks using time and frequency analyses [124]. Likewise, Naas, Rodrigues (125)  
355 tested whether EPOC could enhance cognitive performance in neurofeedback tasks.

356         Three studies validated EPOC for BCI use by comparing its performance to  
357 other device performance on P300 speller tasks [6, 126, 127]. Two others compared  
358 the performance of devices on motor imagery tasks [128, 129]. Finally, Maskeliunas,  
359 Damasevicius (130) compared the capacity of devices to recognise mental states.

360         Since 2013, many studies have sought to determine the validity of EPOC.  
361 While assessment of the conclusions of these studies are outside the aims of this  
362 scoping review, what can be noted is that quantity of studies demonstrates  
363 researchers' interest in employing these devices in their work.

364

## Limitations

365           This scoping review has some limitations. With nearly 400 records selected,  
366 the charting phase represented an enormous undertaking. Although the review  
367 employed a systematic methodology using PRISMA guidelines and searching a  
368 broad array of databases, it was impossible to include every study that used EPOC.  
369 We deliberately omitted common systematic search strategies, such as grey-  
370 literature searching, hand searching, and backward citation searching. We did this as  
371 inclusion of these strategies would not have added enough value to justify the  
372 additional time and resources. We believe this scoping review represents a quality  
373 characterisation of EPOC research and satisfies the stated aims of the project. In  
374 addition, like all scientific reviews, its success depends on the search terms. If a  
375 publication did not contain 'Emotiv' or 'EPOC' in the title, abstract, or keywords, then  
376 it did not appear in our search. We could have overcome this limitation by  
377 broadening our search terms. However, we again believe our search constraints  
378 produced an accurate characterisation of the EPOC literature, without creating an  
379 unwieldy scoping dataset.

380

381

## Conclusion

382           In this scoping review, we aimed to chart the location and purpose of EPOC-  
383 related research. In doing so, we have outlined the many studies that have used  
384 Emotiv EPOC as an EEG acquisition device. From BCI applications to experimental  
385 research studies to clinical environments, the last 10 years has seen diverse  
386 implementation of EPOC. Global use and a low financial barrier likely facilitate  
387 research in areas of limited resources. Considering the cost of a research-grade  
388 EEG system, it is not hard to imagine scientists and engineers in developing nations

389 embracing EPOC as an ideal device with which to conduct neuroscience research.  
390 In addition, this device (and devices like it) may enable collection of data that would  
391 be impossible with traditional EEG devices. For example, Parameshwaran and  
392 Thiagarajan (131) used an EPOC in both rural and urban settings in India to  
393 demonstrate differences in EEG signatures related to factors such as socioeconomic  
394 status, exposure to technology, and travel experience.

395 We expect that this review will provide a useful reference for researchers who  
396 may be looking for cost-effective, portable EEG solutions. We hope it may also serve  
397 as an inspiration for those considering incorporating portable EEG devices into their  
398 research and facilitate the conceptualisation and development of future experiments  
399 and applications.

#### 400 **Acknowledgments and Funding**

401 This review was conducted by the first author who is funded under an industry  
402 partnership grant between Macquarie University and Emotiv Pty Ltd. Emotiv  
403 contributions to this review are limited to a portion of the first author's salary paid  
404 through Macquarie University. Emotiv did not conceive of, nor was involved in, the  
405 development of this manuscript.

406 **S1 PRISMA-ScR Checklist.**

407 **S2 Appendix. Scoping review charted data.**

408

409

410

## Cited References

- 411 1. Stone JL, Hughes JR. Early history of electroencephalography and  
412 establishment of the American Clinical Neurophysiology Society. *Journal of Clinical*  
413 *Neurophysiology*. 2013;30(1):28-44.
- 414 2. Ramirez-Cortes JM, Alarcon-Aquino V, Rosas-Cholula G, Gomez-Gil P,  
415 Escamilla-Ambrosio J, editors. P-300 rhythm detection using ANFIS algorithm and  
416 wavelet feature extraction in EEG signals. 2010 World Congress on Engineering  
417 and Computer Science; 2010; San Francisco, CA, USA: International Association of  
418 Engineers San Francisco.
- 419 3. Ranky G, Adamovich S, editors. Analysis of a commercial EEG device for the  
420 control of a robot arm. *Proceedings of the 2010 IEEE 36th Annual Northeast*  
421 *Bioengineering Conference (NEBEC)*; 2010; New York, NY, USA: IEEE. doi:  
422 10.1109/NEBC.2010.5458188.
- 423 4. Rosas-Cholula G, Ramirez-Cortes JM, Alarcón-Aquino V, Martínez-Carballido  
424 J, Gomez-Gil P, editors. On signal P-300 detection for BCI applications based on  
425 wavelet analysis and ICA preprocessing. 2010 IEEE Electronics, Robotics and  
426 Automotive Mechanics Conference; 2010; Morelos, Mexico: IEEE. doi:  
427 10.1109/CERMA.2010.48.
- 428 5. Goldberg BS, Sottilare RA, Brawner KW, Holden HK, editors. Predicting  
429 learner engagement during well-defined and ill-defined computer-based intercultural  
430 interactions. *International Conference on Affective Computing and Intelligent*  
431 *Interaction*; 2011; Berlin, Germany.: Springer. Retrieved from:  
432 [https://www.gifttutoring.org/attachments/download/126/ACII2011\\_Goldberg\\_et\\_al\\_Predicting\\_Learner\\_Engagement\\_0.pdf](https://www.gifttutoring.org/attachments/download/126/ACII2011_Goldberg_et_al_Predicting_Learner_Engagement_0.pdf).
- 434 6. Duvinage M, Castermans T, Petieau M, Hoellinger T, Cheron G, Dutoit T.  
435 Performance of the Emotiv EPOC headset for P300-based applications. *Biomedical*  
436 *Engineering Online*. 2013;12:56. Epub 2013/06/27. doi: 10.1186/1475-925X-12-56.  
437 PubMed PMID: 23800158; PubMed Central PMCID: PMC3710229.
- 438 7. Rodriguez Ortega A, Rey Solaz B, Raya A, Luis M. Validation of a low-cost  
439 EEG device for mood induction studies. *Annual Review of Cybertherapy and*  
440 *Telemedicine*. 2013;11:43-7. doi: Retrieved from:  
441 <https://riunet.upv.es/handle/10251/78724>.
- 442 8. Badcock NA, Mousikou P, Mahajan Y, de Lissa P, Thie J, McArthur G.  
443 Validation of the Emotiv EPOC EEG gaming system for measuring research quality  
444 auditory ERPs. *PeerJ*. 2013;1:e38. Epub 2013/05/03. doi: 10.7717/peerj.38. PubMed  
445 PMID: 23638374; PubMed Central PMCID: PMC3628843.
- 446 9. de Lissa P, Sorensen S, Badcock N, Thie J, McArthur G. Measuring the face-  
447 sensitive N170 with a gaming EEG system: A validation study. *Journal of*  
448 *Neuroscience Methods*. 2015;253:47-54. Epub 2015/06/10. doi:  
449 10.1016/j.jneumeth.2015.05.025. PubMed PMID: 26057115.
- 450 10. Badcock NA, Preece KA, de Wit B, Glenn K, Fieder N, Thie J, et al. Validation  
451 of the Emotiv EPOC EEG system for research quality auditory event-related  
452 potentials in children. *PeerJ*. 2015;3:e907. Epub 2015/04/30. doi: 10.7717/peerj.907.  
453 PubMed PMID: 25922794; PubMed Central PMCID: PMC364411518.
- 454 11. De Wit B, Badcock NA, Grootswagers T, Hardwick K, Teichmann L, Wehrman  
455 J, et al. Neurogaming technology meets neuroscience education: a cost-effective,

- 456 scalable, and highly portable undergraduate teaching laboratory for neuroscience.  
457 Journal of Undergraduate Neuroscience Education. 2017;15(2):A104.
- 458 12. Alchalabi AE, Eddin AN, Shirmohammadi S, editors. More Attention, Less  
459 Deficit: Wearable EEG-Based Serious Game for Focus Improvement. Ieee Int Conf  
460 Seriou; 2017; Perth, WA. doi: 10.1109/SeGAH.2017.7939288.
- 461 13. Ancau D, Roman N-M, Ancău M, editors. The Emotiv EPOC interface  
462 paradigm in Human-Computer Interaction. MATEC Web of Conferences; 2017: EDP  
463 Sciences. DOI: 10.1051/mateconf/201713704001.
- 464 14. Masood N, Farooq H, editors. Emotiv-Based Low-Cost Brain Computer  
465 Interfaces: A Survey. 2016 International Conference on Neuroergonomics and  
466 Cognitive Engineering; 2017; Orlando, FL, USA. doi: 10.1007/978-3-319-41691-  
467 5\_12.
- 468 15. Rechy-Ramirez E-J, Hu H, McDonald-Maier K, editors. Head movements  
469 based control of an intelligent wheelchair in an indoor environment. 2012 IEEE  
470 International Conference on Robotics and Biomimetics (ROBIO); 2012; Guangzhou,  
471 China: IEEE. doi: 10.1109/ROBIO.2012.6491175.
- 472 16. Thomas KP, Vinod AP. Toward EEG-Based Biometric Systems The Great  
473 Potential of Brain-Wave-Based Biometrics. Ieee Syst Man Cybern. 2017;3(4):6-15.  
474 doi: 10.1109/Msmc.2017.2703651. PubMed PMID: WOS:000414932700004.
- 475 17. Yang S, Deravi F. On the Usability of Electroencephalographic Signals for  
476 Biometric Recognition: A Survey. IEEE Transactions on Human-Machine Systems.  
477 2017;47(6):958-69. doi: 10.1109/Thms.2017.2682115. PubMed PMID:  
478 WOS:000415153100020.
- 479 18. Kutt K, Gunia A, Nalepa GJ, editors. Cognitive enhancement: How to increase  
480 chance of survival in the jungle? 2015 IEEE 2nd International Conference on  
481 Cybernetics (CYBCONF); 2015; Gdynia, Poland: IEEE. doi:  
482 10.1109/CYBConf.2015.7175949.
- 483 19. Mavros P, Coyne R, Roe J, Aspinall P, editors. Engaging the brain:  
484 Implications of mobile EEG for spatial representation. 30th International Conference  
485 on Education and Research in Computer Aided Architectural Design in Europe  
486 (eCAADe); 2012; Prague, Czech Republic. Retrieved from:  
487 [http://papers.cumincad.org/cgi-bin/works/Show?ecaade2012\\_190](http://papers.cumincad.org/cgi-bin/works/Show?ecaade2012_190).
- 488 20. Ijjada MS, Thapliyal H, Caban-Holt A, Arabia HR, editors. Evaluation of  
489 wearable head set devices in older adult populations for research. 2015 International  
490 Conference on Computational Science and Computational Intelligence (CSCI); 2015;  
491 Las Vegas, NV, USA: IEEE. doi: 10.1109/CSCI.2015.158.
- 492 21. Xu JH, Zhong BC. Review on portable EEG technology in educational  
493 research. Computers in Human Behavior. 2018;81:340-9. doi:  
494 10.1016/j.chb.2017.12.037. PubMed PMID: WOS:000423893900033.
- 495 22. Ashok S. High-level hands-free control of wheelchair - a review. Journal of  
496 Medical Engineering & Technology. 2017;41(1):46-64. Epub 2016/08/09. doi:  
497 10.1080/03091902.2016.1210685. PubMed PMID: 27498944.
- 498 23. Ekandem JI, Davis TA, Alvarez I, James MT, Gilbert JE. Evaluating the  
499 ergonomics of BCI devices for research and experimentation. Ergonomics.  
500 2012;55(5):592-8. Epub 2012/04/18. doi: 10.1080/00140139.2012.662527. PubMed  
501 PMID: 22506831.
- 502 24. Jenita B, Umamakeswari A, Sree J. An approach toward wireless brain-  
503 computer interface system using EEG signals: A review. National Journal of  
504 Physiology, Pharmacy and Pharmacology. 2015;5(5). doi:  
505 10.5455/njppp.2015.5.0306201555.

- 506 25. Mihajlović V, Grundlehner B, Vullers R, Penders JJljob, informatics h.  
507 Wearable, wireless EEG solutions in daily life applications: what are we missing?  
508 IEEE Journal of Biomedical  
509 Health Informatics. 2015;19(1):6-21.
- 510 26. Niha K, Banu WA, editors. Brain signal processing: Technologies, analysis  
511 and application. 2016 IEEE International Conference on Computational Intelligence  
512 and Computing Research (ICCI); 2016; Chennai, India: IEEE. doi:  
513 10.1109/ICCI.2016.7919569.
- 514 27. Arksey H, O'Malley L. Scoping studies: towards a methodological framework.  
515 International journal of social research methodology. 2005;8(1):19-32.
- 516 28. Tricco AC, Lillie E, Zarin W, O'Brien KK, Colquhoun H, Levac D, et al.  
517 PRISMA extension for scoping reviews (PRISMA-ScR): checklist and explanation.  
518 Annals of internal medicine. 2018;169(7):467-73.
- 519 29. Boutani H, Ohsuga M, editors. Applicability of the “Emotiv EEG  
520 Neuroheadset” as a user-friendly input interface. 2013 35th Annual International  
521 Conference of the IEEE Engineering in Medicine and Biology Society (EMBC); 2013;  
522 Osaka, Japan: IEEE. doi: 10.1109/EMBC.2013.6609758.
- 523 30. Mayaud L, Congedo M, Van Laghenhove A, Orlikowski D, Figere M, Azabou  
524 E, et al. A comparison of recording modalities of P300 event-related potentials (ERP)  
525 for brain-computer interface (BCI) paradigm. Neurophysiologie Clinique.  
526 2013;43(4):217-27. Epub 2013/10/08. doi: 10.1016/j.neucli.2013.06.002. PubMed  
527 PMID: 24094907.
- 528 31. Jolfaei A, Wu X-W, Muthukkumarasamy V, editors. On the feasibility and  
529 performance of pass-thought authentication systems. Emerging Security  
530 Technologies (EST), 2013 Fourth International Conference on; 2013; Cambridge,  
531 UK: IEEE. doi: 10.1109/EST.2013.12.
- 532 32. Moctezuma LA, Torres-Garcia AA, Villasenor-Pineda L, Carrillo M. Subjects  
533 identification using EEG-recorded imagined speech. Expert Systems with  
534 Applications. 2019;118:201-8. doi: 10.1016/j.eswa.2018.10.004. PubMed PMID:  
535 WOS:000451653400014.
- 536 33. Seha SNA, Hatzinakos D. Human recognition using transient auditory evoked  
537 potentials: a preliminary study. IET Biometrics. 2018;7(3):242-50. doi: 10.1049/iet-  
538 bmt.2017.0185
- 539 34. Elsayw AS, Eldawlatly S, Taher M, Aly GM. MindEdit: A P300-based text  
540 editor for mobile devices. Computers in Biology and Medicine. 2017;80:97-106. Epub  
541 2016/12/05. doi: 10.1016/j.compbimed.2016.11.014. PubMed PMID: 27915127.
- 542 35. Jijun T, Peng Z, Ran X, Lei D, editors. The portable P300 dialing system  
543 based on tablet and Emotiv EPOC headset. Engineering in Medicine and Biology  
544 Society (EMBC), 2015 37th Annual International Conference of the IEEE; 2015;  
545 Milan, Italy: IEEE. doi: 10.1109/EMBC.2015.7318425.
- 546 36. Meshriky MR, Eldawlatly S, Aly GM, editors. An Intermixed Color Paradigm  
547 for P300 Spellers: A Comparison with Gray-scale Spellers. 2017 IEEE 30th  
548 International Symposium on Computer-Based Medical Systems (CBMS); 2017;  
549 Thessaloniki, Greece. doi: 10.1109/Cbms.2017.123.
- 550 37. Tahmasebzadeh A, Bahrani M, Setarehdan SK, editors. Development of a  
551 robust method for an online P300 Speller Brain Computer Interface. 2013 6th  
552 International IEEE/EMBS Conference on Neural Engineering (NER); 2013; San  
553 Diego, CA, USA. doi: 10.1109/NER.2013.6696122.
- 554 38. Fan X-a, Bi L, Teng T, Ding H, Liu Y. A brain-computer interface-based  
555 vehicle destination selection system using P300 and SSVEP signals. IEEE

- 556 Transactions on Intelligent Transportation Systems. 2015;16(1):274-83. doi: doi:  
557 10.1109/TITS.2014.2330000.
- 558 39. Nurseitov D, Serekov A, Shintemirov A, Abibullaev B, editors. Design and  
559 Evaluation of a P300-ERP based BCI System for Real-Time Control of a Mobile  
560 Robot. 2017 5th International Winter Conference on Brain-Computer Interface (BCI);  
561 2017; Sabuk, South Korea. doi: 10.1109/IWW-BCI.2017.7858177.
- 562 40. Suhas K, Dhal S, Shankar PV, Hugar SH, Tejas C, editors. A Controllable  
563 Home Environment for the Physically Disabled Using the Principles of BCI. 2018 9th  
564 International Conference on Computing, Communication and Networking  
565 Technologies (ICCCNT); 2018; Bangalore, India: IEEE. doi:  
566 10.1109/ICCCNT.2018.8494070.
- 567 41. Garcia AP, Schjølberg I, Gale S, editors. EEG control of an industrial robot  
568 manipulator. 2013 IEEE 4th International Conference on Cognitive  
569 Infocommunications (CogInfoCom); 2013; Budapest, Hungary: IEEE. doi:  
570 10.1109/CogInfoCom.2013.6719280.
- 571 42. Gargava P, Sindwani K, Soman S, editors. Controlling an arduino robot using  
572 Brain Computer Interface. 2014 3rd International Conference on Reliability, Infocom  
573 Technologies and Optimization (ICRITO)(Trends and Future Directions); 2014;  
574 Noida, India: IEEE. doi: 10.1109/ICRITO.2014.7014713.
- 575 43. Grude S, Freeland M, Yang C, Ma H, editors. Controlling mobile Spykee robot  
576 using Emotiv neuro headset. 2013 32nd Chinese Control Conference (CCC); 2013;  
577 Xi'an, China: IEEE. Retrieved from: <https://ieeexplore.ieee.org/document/6640475>.
- 578 44. Guneyusu A, Akin HL, editors. An SSVEP based BCI to control a humanoid  
579 robot by using portable EEG device. 2013 35th Annual International Conference of  
580 the IEEE Engineering in Medicine and Biology Society (EMBC); 2013; Osaka, Japan:  
581 IEEE. doi: 10.1109/EMBC.2013.6611145.
- 582 45. Malki A, Yang C, Wang N, Li Z, editors. Mind guided motion control of robot  
583 manipulator using EEG signals. 2015 5th International Conference on Information  
584 Science and Technology (ICIST); 2015; Changsha, China: IEEE. doi:  
585 10.1109/ICIST.2015.7289033.
- 586 46. Mondada L, Karim ME, Mondada F. Electroencephalography as implicit  
587 communication channel for proximal interaction between humans and robot swarms.  
588 Swarm Intelligence. 2016;10(4):247-65. doi: 10.1007/s11721-016-0127-0. PubMed  
589 PMID: WOS:000389629200002.
- 590 47. Szafir D, Signorile R, editors. An exploration of the utilization of  
591 electroencephalography and neural nets to control robots. IFIP Conference on  
592 Human-Computer Interaction; 2011; Lisbon, Portugal: Springer. doi: 10.1007/978-3-  
593 642-23768-3.
- 594 48. Gomez-Gil J, San-Jose-Gonzalez I, Nicolas-Alonso LF, Alonso-Garcia S.  
595 Steering a tractor by means of an EMG-based human-machine interface. Sensors  
596 (Basel). 2011;11(7):7110-26. Epub 2011/12/14. doi: 10.3390/s110707110. PubMed  
597 PMID: 22164006; PubMed Central PMCID: PMC3231667.
- 598 49. Song Y, Liu J, Gao Q, Liu M, editors. A quadrotor helicopter control system  
599 based on Brain-computer interface. 2015 IEEE International Conference on  
600 Mechatronics and Automation (ICMA); 2015; Beijing, China: IEEE. doi:  
601 10.1109/ICMA.2015.7237703.
- 602 50. Bobrov P, Frolov A, Cantor C, Fedulova I, Bakhnyan M, Zhavoronkov A.  
603 Brain-computer interface based on generation of visual images. PLoS One.  
604 2011;6(6):e20674. Epub 2011/06/23. doi: 10.1371/journal.pone.0020674. PubMed  
605 PMID: 21695206; PubMed Central PMCID: PMC3112189.

- 606 51. Zhou Y, Xu T, Li S, editors. Confusion State Induction and EEG-based  
607 Detection in Learning. 2018 40th Annual International Conference of the IEEE  
608 Engineering in Medicine and Biology Society (EMBC); 2018; Honolulu, HI, USA:  
609 NLM (Medline). <http://dx.doi.org/10.1109/EMBC.2018.8512943>.
- 610 52. Xiao H, Duan YG, Zhang ZB, Li M. Detection and estimation of mental fatigue  
611 in manual assembly process of complex products. *Assembly Automation*.  
612 2018;38(2):239-47. doi: 10.1108/aa-03-2017-040. PubMed PMID:  
613 WOS:000426675800011.
- 614 53. Lekova A, Dimitrova M, Kostova S, Bouattane O, Ozaeta L, editors. BCI for  
615 Assessing the Emotional and Cognitive Skills of Children with Special Educational  
616 Needs. 2018 IEEE 5th International Congress on Information Science and  
617 Technology (CiSt); 2018 21-27 Oct. 2018; Marrakech, Morocco. doi:  
618 10.1109/CIST.2018.8596571.
- 619 54. Matlovic T, Gaspar P, Moro R, Simko J, Bielikova M, editors. Emotions  
620 detection using facial expressions recognition and EEG. 2016 11th International  
621 Workshop on Semantic and Social Media Adaptation and Personalization (SMAP);  
622 2016; Thessaloniki, Greece: IEEE. doi: 10.1109/SMAP.2016.7753378.
- 623 55. Sanchez-Reolid R, Garcia AS, Vicente-Querol MA, Fernandez-Aguilar L,  
624 Lopez MT, Fernandez-Caballero A, et al. Artificial Neural Networks to Assess  
625 Emotional States from Brain-Computer Interface. *Electronics*. 2018;7(12). doi:  
626 10.3390/electronics7120384. PubMed PMID: WOS:000455067800043.
- 627 56. Binias B, Myszor D, Cyran KA. A Machine Learning Approach to the Detection  
628 of Pilot's Reaction to Unexpected Events Based on EEG Signals. *Computational  
629 intelligence and neuroscience*. 2018;2018:2703513. doi:  
630 <http://dx.doi.org/10.1155/2018/2703513>.
- 631 57. Perez-Vidal AE, Garcia-Beltran CD, Martinez-Sibaja A, Posada-Gomez R.  
632 Use of the Stockwell Transform in the Detection of P300 Evoked Potentials with  
633 Low-Cost Brain Sensors. *Sensors*. 2018;18(5). doi: 10.3390/s18051483. PubMed  
634 PMID: WOS:000435580300182.
- 635 58. Munoz J, Villada J, Munoz C, Henao O, editors. Multimodal system for  
636 rehabilitation aids using videogames. 2014 IEEE Central America and Panama  
637 Convention (CONCAPAN XXXIV); 2014; Panama City, Panama: IEEE. doi:  
638 10.1109/CONCAPAN.2014.7000395.
- 639 59. Verplaetse T, Sanfilippo F, Rutle A, Osen OL, Bye RT, editors. On Usage of  
640 EEG Brain Control for Rehabilitation of Stroke Patients. 30th European Conference  
641 on Modelling and Simulation; 2016. doi: 10.7148/2016-0544.
- 642 60. Ramirez R, Palencia-Lefler M, Giraldo S, Vamvakousis Z. Musical  
643 neurofeedback for treating depression in elderly people. *Frontiers in Neuroscience*.  
644 2015;9:354. Epub 2015/10/21. doi: 10.3389/fnins.2015.00354. PubMed PMID:  
645 26483628; PubMed Central PMCID: PMC4591427.
- 646 61. Al-Taleb MKH, Purcell M, Fraser M, Petric-Gray N, Vuckovic A. Home used,  
647 patient self-managed, brain-computer interface for the management of central  
648 neuropathic pain post spinal cord injury: usability study. *Journal of neuroengineering  
649 and rehabilitation*. 2019;16(1):128. doi: <http://dx.doi.org/10.1186/s12984-019-0588-7>.
- 650 62. Vuckovic A, Al-Taleb MKH, Fraser M, McGeedy C, Purcell M. EEG correlates  
651 of self-managed neurofeedback treatment of central neuropathic pain in chronic  
652 spinal cord injury. *Frontiers in Neuroscience*. 2019;13(JUL):762. doi:  
653 <http://dx.doi.org/10.3389/fnins.2019.00762>.
- 654 63. Wang D, Mo F, Zhang Y, Yang C, Liu J, Chen Z, et al. Auditory evoked  
655 potentials in patients with major depressive disorder measured by Emotiv system.



- 656 Bio-medical materials and engineering. 2015;26(s1):S917-S23. doi: 10.3233/BME-  
657 151385.
- 658 64. Mercado-Aguirre IM, Gutierrez-Ruiz K, Contreras-Ortiz SH, editors.  
659 Acquisition and analysis of cognitive evoked potentials using an Emotiv headset for  
660 ADHD evaluation in children. 2019 XXII Symposium on Image, Signal Processing  
661 and Artificial Vision (STSIVA); 2019; Bucaramanga, Colombia. doi:  
662 10.1109/stsiva.2019.8730225.
- 663 65. Martinez F, Barraza C, Gonzalez N, Gonzalez J. KAPEAN: Understanding  
664 Affective States of Children with ADHD. Educational Technology & Society.  
665 2016;19(2):18-28. doi: Retrieved from:  
666 [https://www.jstor.org/stable/10.2307/jeductechsoci.19.2.188?seq=1&cid=pdf-](https://www.jstor.org/stable/10.2307/jeductechsoci.19.2.188?seq=1&cid=pdf-reference#references_tab_contents)  
667 [reference#references\\_tab\\_contents](https://www.jstor.org/stable/10.2307/jeductechsoci.19.2.188?seq=1&cid=pdf-reference#references_tab_contents). PubMed PMID: WOS:000375636600003.
- 668 66. Schiff S, Casa M, Di Caro V, Aprile D, Spinelli G, De Rui M, et al. A low-cost,  
669 user-friendly electroencephalographic recording system for the assessment of  
670 hepatic encephalopathy. Hepatology. 2016;63(5):1651-9. Epub 2016/02/03. doi:  
671 10.1002/hep.28477. PubMed PMID: 26833704.
- 672 67. Cotuk HB, Duru AD, Aktas S. Monitoring Autonomic and Central Nervous  
673 System Activity by Permutation Entropy during Short Sojourn in Antarctica. Entropy.  
674 2019;21(9). doi: 10.3390/e21090893. PubMed PMID: WOS:000489176800077.
- 675 68. Sinha A, Chatterjee D, Das R, Datta S, Gavas R, Saha SK, editors. Artifact  
676 Removal from EEG Signals Recorded Using Low Resolution Emotiv Device. 2015  
677 IEEE International Conference on Systems, Man, and Cybernetics; 2015; Kowloon,  
678 China: IEEE. doi: 10.1109/SMC.2015.256.
- 679 69. Soumya I, Zia Ur Rahman M, Rama Koti Reddy D, Lay-Ekuakille A. Efficient  
680 block processing of long duration biotelemetric brain data for health care monitoring.  
681 Review of Scientific Instruments. 2015;86(3):035003.
- 682 70. Jun Hou T, Mustafa M, Zahari ZL, Pebrianti D, Zain ZM, Noordin NH, et al.,  
683 editors. Time-frequency Analysis from Earthing Application. 10th National Technical  
684 Seminar on Underwater System Technology 2018; 2019. 10.1007/978-981-13-3708-  
685 6\_36.
- 686 71. Moran A, Soriano MC. Improving the quality of a collective signal in a  
687 consumer EEG headset. PLoS ONE. 2018;13(5):e0197597. doi:  
688 <http://dx.doi.org/10.1371/journal.pone.0197597>.
- 689 72. Petrov BB, Stamenova ED, Petrov NB, editors. Brain-computer interface as  
690 internet of things device. 2016 XXV International Scientific Conference Electronics  
691 (ET); 2016; **Sozopol, Bulgaria**: IEEE. doi: 10.1109/ET.2016.7753505.
- 692 73. Shahzadi R, Anwar SM, Qamar F, Ali M, Rodrigues JJPC, Alnowami M.  
693 Secure EEG Signal Transmission for Remote Health Monitoring Using Optical  
694 Chaos. IEEE Access. 2019;7:57769-78. doi: 10.1109/ACCESS.2019.2912548.
- 695 74. Chatterjee D, Das R, Sinha A, Datta S, editors. Analyzing elementary  
696 cognitive tasks with Bloom's taxonomy using low cost commercial EEG device. 2015  
697 IEEE Tenth International Conference on Intelligent Sensors, Sensor Networks and  
698 Information Processing (ISSNIP); 2015; Singapore, Singapore: IEEE. doi:  
699 10.1109/ISSNIP.2015.7106928.
- 700 75. Díaz MH, Cordova FM, Canete L, Palominos F, Cifuentes F, Sanchez C, et al.  
701 Order and chaos in the brain: fractal time series analysis of the EEG activity during a  
702 cognitive problem solving task. Procedia Computer Science. 2015;55:1410-9. doi:  
703 doi: 10.1016/j.procs.2015.07.135.
- 704 76. Cordova FM, Diaz H, Cifuentes F, Canete L, Palominos F. Identifying problem  
705 solving strategies for learning styles in engineering students subjected to intelligence

- 706 test and EEG monitoring. *Procedia Computer Science*. 2015;55:18-27. doi:  
707 10.1016/j.procs.2015.07.003. PubMed PMID: WOS:000360101400002.
- 708 77. Szarkowska A, Krejtz K, Dutka L, Pilipczuk O. Cognitive Load in Intralingual  
709 and Interlingual Respeaking - a Preliminary Study. *Poznan Studies in Contemporary*  
710 *Linguistics*. 2016;52(2):209-33. doi: 10.1515/psicl-2016-0008. PubMed PMID:  
711 WOS:000378062400004.
- 712 78. Sawicki D, Wolska A, Roslon P, Ordysinski S, editors. New EEG Measure of  
713 the Alertness Analyzed by Emotiv EPOC in a Real Working Environment. 4th  
714 International Congress on Neurotechnology, Electronics and Informatics; 2016. doi:  
715 10.5220/0006041200350042.
- 716 79. Sena P, d'Amore M, Brandimonte MA, Squitieri R, Fiorentino A. Experimental  
717 framework for simulators to study driver cognitive distraction: brake reaction time in  
718 different levels of arousal. *Transp Res Proc*. 2016;14:4410-9. doi:  
719 10.1016/j.trpro.2016.05.363. PubMed PMID: WOS:000383251004053.
- 720 80. Calvo H, Paredes JL, Figueroa-Nazuno J. Measuring concept semantic  
721 relatedness through common spatial pattern feature extraction on EEG signals.  
722 *Cognitive Systems Research*. 2018;50:36-51. doi:  
723 <http://dx.doi.org/10.1016/j.cogsys.2018.03.004>.
- 724 81. Ousterhout T, editor Cross-form facilitation effects from simultaneous  
725 gesture/word combinations with ERP analysis. 2015 6th IEEE International  
726 Conference on Cognitive Infocommunications (CogInfoCom); 2015; Gyor, Hungary:  
727 IEEE. doi: 10.1109/CogInfoCom.2015.7390643.
- 728 82. Ousterhout T, editor N400 congruency effects from emblematic gesture  
729 probes following sentence primes. 2015 IEEE 19th International Conference on  
730 Intelligent Engineering Systems (INES); 2015; Bratislava, Slovakia: IEEE. doi:  
731 10.1109/INES.2015.7329744.
- 732 83. Beardsley M, Hernandez-Leo D, Ramirez-Melendez R. Seeking  
733 reproducibility: Assessing a multimodal study of the testing effect. *Journal of*  
734 *Computer Assisted Learning*. 2018;34(4):378-86. doi: 10.1111/jcal.12265. PubMed  
735 PMID: WOS:000439797800006.
- 736 84. Mavros P, editor A neuropsychological perspective of spatial experience.  
737 2015 Sixth International Conference on Spatial Cognition (ICSC); 2015 Sep; Rome,  
738 Italy. <http://dx.doi.org/10.1007/s10339-015-0732-7>.
- 739 85. Jadav GM, Vrankić M, Vlahinić S, editors. Monitoring cerebral processing of  
740 gustatory stimulation and perception using emotiv epoc. 2015 38th International  
741 Convention on Information and Communication Technology, Electronics and  
742 Microelectronics (MIPRO); 2015; Opatija, Croatia: IEEE. doi:  
743 10.1109/MIPRO.2015.7160351.
- 744 86. Kusumawardani SR, Fitri LL, Suprijanto, editors. Theta Brainwave Activity as  
745 the Response to Lavender (*Lavendula angustifolia*) Aromatherapy Inhalation of  
746 Postgraduate Students with Academic Stress Condition. *Iop Conf Ser-Mat Sci*;  
747 2017. doi: 10.1088/1757-899x/180/1/012271.
- 748 87. Szalowski A, Picovici D, editors. Investigating brain signal peaks vs  
749 electroencephalograph electrode placement using multicolour 10Hz flickering  
750 graphics stimulation for Brain-Computer Interface development. 2016 27th Irish  
751 Signals and Systems Conference (ISSC); 2016; Londonderry, UK. doi:  
752 10.1109/ISSC.2016.7528453.
- 753 88. Szalowski A, Picovici D, editors. Investigating stimuli graphics' size and  
754 resolution performance in Steady State Visual Evoked Potential. 2017 28th Irish

- 755 Signals and Systems Conference (ISSC); 2017; Killarney, Ireland. doi:  
756 10.1109/ISSC.2017.7983618.
- 757 89. Rosenbaum MS, Contreras Ramirez G, Matos N. A neuroscientific  
758 perspective of consumer responses to retail greenery. *Service Industries Journal*.  
759 2019;39(15-16):1034-45. doi: 10.1080/02642069.2018.1487406. PubMed PMID:  
760 WOS:000503221800002.
- 761 90. Bercik J, Horska E, Wang RW, Chen YC. The impact of parameters of store  
762 illumination on food shopper response. *Appetite*. 2016;106:101-9. Epub 2016/04/17.  
763 doi: 10.1016/j.appet.2016.04.010. PubMed PMID: 27083127.
- 764 91. Khushaba RN, Wise C, Kodagoda S, Louviere J, Kahn BE, Townsend C.  
765 Consumer neuroscience: Assessing the brain response to marketing stimuli using  
766 electroencephalogram (EEG) and eye tracking. *Expert Systems with Applications*.  
767 2013;40(9):3803-12. doi: 10.1016/j.eswa.2012.12.095. PubMed PMID:  
768 WOS:000316581300044.
- 769 92. Khushaba RN, Greenacre L, Al-Timemy A, Al-Jumaily A. Event-Related  
770 Potentials of Consumer Preferences. *Procedia Computer Science*. 2015;76:68-73.  
771 doi: 10.1016/j.procs.2015.12.277. PubMed PMID: WOS:000373789200011.
- 772 93. Perfumi SC, Cardelli C, Bagnoli F, Guazzini A, editors. Conformity in virtual  
773 environments: a hybrid neurophysiological and psychosocial approach. *International*  
774 *Conference on Internet Science*; 2016; Florence, Italy: Springer.
- 775 94. Marcelo CAG, Pasquin ZRB, Pichay ADT, Tan MLD, Simon MFKN, Prado SV,  
776 et al., editors. Characterization and Comparison of Brain Wave Signals during  
777 Deception. 2017 IEEE 9th International Conference on Humanoid, Nanotechnology,  
778 Information Technology, Communication and Control, Environment and  
779 Management (HNICEM); 2017; Manila, Philippines. doi:  
780 10.1109/HNICEM.2017.8269508.
- 781 95. Antons J-N, Arndt S, De Moor K, Zander S, editors. Impact of perceived  
782 quality and other influencing factors on emotional video experience. 2015 Seventh  
783 International Workshop on Quality of Multimedia Experience (QoMEX); 2015; Pylos-  
784 Nestoras, Greece: IEEE. doi: 10.1109/QoMEX.2015.7148124.
- 785 96. Babiker A, Faye I, Malik A, editors. Investigation of situational interest effects  
786 on learning using physiological sensors: Preliminary result. 2016 6th International  
787 Conference on Intelligent and Advanced Systems (ICIAS); 2016; Kuala Lumpur,  
788 Malaysia: IEEE. doi: 10.1109/ICIAS.2016.7824075.
- 789 97. Askari E, Setarehdan SK, Sheikhan A, Mohammadi MR, Teshnehlab M.  
790 Designing a model to detect the brain connections abnormalities in children with  
791 autism using 3D-cellular neural networks. *Journal of Integrative Neuroscience*.  
792 2018;17(3-4):391-411. doi: <http://dx.doi.org/10.3233/JIN-180075>.
- 793 98. Askari E, Setarehdan SK, Sheikhan A, Mohammadi MR, Teshnehlab M.  
794 Modeling the connections of brain regions in children with autism using cellular  
795 neural networks and electroencephalography analysis. *Artificial Intelligence in*  
796 *Medicine*. 2018;89:40-50. doi: <http://dx.doi.org/10.1016/j.artmed.2018.05.003>.
- 797 99. Fan J, Wade JW, Key AP, Warren ZE, Sarkar N. EEG-Based Affect and  
798 Workload Recognition in a Virtual Driving Environment for ASD Intervention. *IEEE*  
799 *Transactions on Biomedical Engineering*. 2018;65(1):43-51. Epub 2017/04/20. doi:  
800 10.1109/TBME.2017.2693157. PubMed PMID: 28422647; PubMed Central PMCID:  
801 PMC5638702.
- 802 100. Handayani N, Khotimah SN, Haryanto F, Arif I, Taruno WP, editors. Resting  
803 State EEG Power, Intra-Hemisphere and Inter-Hemisphere Coherence in Bipolar

- 804 Disorder. AIP Conference Proceedings; 2017; Bydgoszcz, Poland. doi:  
805 10.1063/1.4976797.
- 806 101. Handayani N, Haryanto F, Khotimah SN, Arif I, Taruno WP. Coherence and  
807 phase synchrony analyses of EEG signals in Mild Cognitive Impairment (MCI): A  
808 study of functional brain connectivity. Polish Journal of Medical Physics and  
809 Engineering. 2018;24(1):1-9. doi: <http://dx.doi.org/10.2478/pjmpe-2018-0001>.
- 810 102. Adamos AC, Beredo JD, Garcia CJG, Mateo WB, Villalobos MJM, Prado SV,  
811 et al., editors. A Comparison of Brain Activities Stimulated by Playing Different Video  
812 Game Genres using Electroencephalogram Signal Analysis. 2017 IEEE 9th  
813 International Conference on Humanoid, Nanotechnology, Information Technology,  
814 Communication and Control, Environment and Management (IEEE HNICEM); 2017;  
815 Manilla. doi: 10.1109/HNICEM.2017.8269514.
- 816 103. Aliyari H, Sahraei H, Daliri MR, Minaei-Bidgoli B, Kazemi M, Aghaei H, et al.  
817 Research Paper: The beneficial or harmful effects of computer game stress on  
818 cognitive functions of players. Basic and Clinical Neuroscience. 2018;9(3):177-86.  
819 doi: <http://dx.doi.org/10.29252/nirp.bcn.9.3.177>.
- 820 104. He S, Chen L, Yue M. Reliability analysis of driving behaviour in road traffic  
821 system considering synchronization of neural activity. NeuroQuantology.  
822 2018;16(4):62-8. doi: <http://dx.doi.org/10.14704/nq.2018.16.4.1209>.
- 823 105. Purawijaya DA, Fitri LL, Suprijanto, editors. Evaluation of blue light exposure  
824 to beta brainwaves on simulated night driving. AIP Conference Proceedings; 2015:  
825 AIP Publishing. doi: <https://doi.org/10.1063/1.4930757>.
- 826 106. Sugiono S, Denny W, Andriani DP. The impact of road complexity on the  
827 psychophysiological load experienced by car drivers using electroencephalography  
828 (EEG) measurement of brainwaves. Acta Neuropsychologica. 2018;16(4):361-74.  
829 doi: <http://dx.doi.org/10.5604/01.3001.0012.7926>.
- 830 107. Neale C, Aspinall P, Roe J, Tilley S, Mavros P, Cinderby S, et al. The Aging  
831 Urban Brain: Analyzing Outdoor Physical Activity Using the Emotiv Affectiv Suite in  
832 Older People. Journal of Urban Health. 2017;94(6):869-80. doi: doi: 10.1007/s11524-  
833 017-0191-9.
- 834 108. Oliveira SMSd, Medeiros CSPd, Pacheco TBF, Bessa NPOS, Silva FGM,  
835 Tavares NSA, et al. Electroencephalographic changes using virtual reality program:  
836 Technical note. Neurological research. 2018;40(3):160-5. doi: doi:  
837 10.1080/01616412.2017.1420584.
- 838 109. Diaz H, Rivas G, Cordova FM, Palominos F, Canete L, Troncoso N.  
839 Specialized Brains Performing Specialized Tasks: Beta/Gamma EEG Non-linear  
840 Analysis Reveals Discriminative Differences between the Chaos/no-chaos Content  
841 of Specialized Brain's Dynamics. Procedia Computer Science. 2016;91:813-22. doi:  
842 10.1016/j.procs.2016.07.086. PubMed PMID: WOS:000387683300097.
- 843 110. Ji L, Wang H, Zheng TQ, Hua CC, Zhang NN. Correlation analysis of EEG  
844 alpha rhythm is related to golf putting performance. Biomedical Signal Processing  
845 and Control. 2019;49:124-36. doi: <http://dx.doi.org/10.1016/j.bspc.2018.11.009>.
- 846 111. Rodriguez Ortega A, Rey Solaz B, Raya A, Luis M. Evaluating virtual reality  
847 mood induction procedures with portable EEG devices. Annual Review of  
848 Cybertherapy and Telemedicine. 2013;11:131-5. doi: Retrieved from:  
849 <https://riunet.upv.es/handle/10251/78725>.
- 850 112. Liu XQ, Chao F, Jiang M, Zhou CL, Ren WF, Shi MH, editors. Towards Low-  
851 Cost P300-Based BCI Using Emotiv Epoc Headset. 17th UK Workshop on  
852 Computational Intelligence; 2017; Cardiff, UK. doi: 10.1007/978-3-319-66939-7\_20.

- 853 113. Barham MP, Clark GM, Hayden MJ, Enticott PG, Conduit R, Lum JAG.  
854 Acquiring research-grade ERPs on a shoestring budget: A comparison of a modified  
855 Emotiv and commercial SynAmps EEG system. *Psychophysiology*. 2017;54(9):1393-  
856 404. Epub 2017/05/13. doi: 10.1111/psyp.12888. PubMed PMID: 28497557.
- 857 114. Ries AJ, Touryan J, Vettel J, McDowell K, Hairston WD. A Comparison of  
858 Electroencephalography Signals Acquired from Conventional and Mobile Systems.  
859 *Journal of Neuroscience and Neuroengineering*. 2014;3(1):10-20. doi:  
860 10.1166/jnsne.2014.1092.
- 861 115. Torok Á, Sulykos I, Kecskes-Kovacs K, Persa G, Galambos P, Kobor A, et al.,  
862 editors. Comparison between wireless and wired EEG recordings in a virtual reality  
863 lab: Case report. 2014 5th IEEE Conference on Cognitive Infocommunications  
864 (CogInfoCom); 2014; Vietri sul Mare, Italy: IEEE. doi:  
865 10.1109/CogInfoCom.2014.7020414.
- 866 116. Wang DC, Chen ZC, Yang C, Lu J, Mo FM, Zhang YD. Validation of the  
867 Mobile Emotiv Device Using a Neuroscan Event-Related Potential System. *Journal*  
868 *of Medical Imaging and Health Informatics*. 2015;5(7):1553-7. doi:  
869 10.1166/jmihi.2015.1563. PubMed PMID: WOS:000362695500031.
- 870 117. Tello RM, Müller SM, Bastos-Filho T, Ferreira A, editors. Comparison  
871 between wire and wireless EEG acquisition systems based on SSVEP in an  
872 Independent-BCI. 2014 36th Annual International Conference of the IEEE  
873 Engineering in Medicine and Biology Society; 2014; Chicago, IL, USA: IEEE. doi:  
874 10.1109/EMBC.2014.6943519.
- 875 118. Szalowski A, Picovici D, editors. Investigating the robustness of constant and  
876 variable period graphics in eliciting steady state visual evoked potential signals using  
877 Emotiv EPOC, MATLAB, and Adobe after effects. 2015 26th Irish Signals and  
878 Systems Conference (ISSC); 2015; Carlow, Ireland: IEEE. doi:  
879 10.1109/ISSC.2015.7163777.
- 880 119. Melnik A, Legkov P, Izdebski K, Kärcher SM, Hairston WD, Ferris DP, et al.  
881 Systems, subjects, sessions: To what extent do these factors influence EEG data?  
882 *Journal of Frontiers in Human Neuroscience*. 2017;11:150. doi: doi:  
883 10.3389/fnhum.2017.00150.
- 884 120. Kotowski K, Stapor K, Leski J, Kotas M. Validation of Emotiv EPOC+ for  
885 extracting ERP correlates of emotional face processing. *Biocybernetics and*  
886 *Biomedical Engineering*. 2018;38(4):773-81. doi:  
887 <http://dx.doi.org/10.1016/j.bbe.2018.06.006>.
- 888 121. Takehara D, Kayanuma H, Matsubara M, Seki N, Wada K, Kurata M, et al.,  
889 editors. Development of an ERD measurement system using Emotiv EPOC.  
890 *Japanese Society for Medical Biological Engineering*; 2017.  
891 <https://doi.org/10.11239/jsmbe.55Annual.556>.
- 892 122. Grummett TS, Leibbrandt RE, Lewis TW, DeLosAngeles D, Powers DM,  
893 Willoughby JO, et al. Measurement of neural signals from inexpensive, wireless and  
894 dry EEG systems. *Physiological Measurement*. 2015;36(7):1469-84. Epub  
895 2015/05/29. doi: 10.1088/0967-3334/36/7/1469. PubMed PMID: 26020164.
- 896 123. Das R, Chatterjee D, Das D, Sinharay A, Sinha A, editors. Cognitive load  
897 measurement - A methodology to compare low cost commercial EEG devices. 2014  
898 International Conference on Advances in Computing, Communications and  
899 Informatics (ICACCI); 2014; New Delhi, India: IEEE. doi:  
900 10.1109/ICACCI.2014.6968528.
- 901 124. Raduntz T. Signal quality evaluation of emerging EEG devices. *Frontiers in*  
902 *Physiology*. 2018;9:98. doi: <http://dx.doi.org/10.3389/fphys.2018.00098>.

- 903 125. Naas A, Rodrigues J, Knirsch JP, Sonderegger A. Neurofeedback training  
904 with a low-priced EEG device leads to faster alpha enhancement but shows no effect  
905 on cognitive performance: A single-blind, sham-feedback study. PLoS ONE.  
906 2019;14(9):e0211668. doi: <http://dx.doi.org/10.1371/journal.pone.0211668>.  
907 126. Nijboer F, van de Laar B, Gerritsen S, Nijholt A, Poel M. Usability of Three  
908 Electroencephalogram Headsets for Brain-Computer Interfaces: A Within Subject  
909 Comparison. *Interacting with Computers*. 2015;27(5):500-11. doi:  
910 10.1093/iwc/iwv023. PubMed PMID: WOS:000364776100003.  
911 127. Wang Y, Wang Z, Clifford W, Markham C, Ward TE, Deegan C, editors.  
912 Validation of low-cost wireless EEG system for measuring event-related potentials.  
913 2018 29th Irish Signals and Systems Conference (ISSC); 2018; Belfast, UK: IEEE.  
914 doi: 10.1109/ISSC.2018.8585297.  
915 128. Martinez-Leon J-A, Cano-Izquierdo J-M, Ibarrola J. Are low cost Brain  
916 Computer Interface headsets ready for motor imagery applications? *Expert Systems*  
917 *with Applications*. 2016;49:136-44. doi: <http://dx.doi.org/10.1016/j.eswa.2015.11.015>.  
918 129. Senadeera M, Maire F, Rakotonirainy A, editors. Turning gaming EEG  
919 peripherals into trainable brain computer interfaces. *Australasian Joint Conference*  
920 *on Advances in Artificial Intelligence*; 2015; Canberra, ACT, Australia: Springer. doi:  
921 10.1007/978-3-319-26350-2.  
922 130. Maskeliunas R, Damasevicius R, Martisius I, Vasiljevas M. Consumer-grade  
923 EEG devices: are they usable for control tasks? *PeerJ*. 2016;4:e1746. Epub  
924 2016/03/26. doi: 10.7717/peerj.1746. PubMed PMID: 27014511; PubMed Central  
925 PMCID: PMCPMC4806709.  
926 131. Parameshwaran D, Thiagarajan TC. Complexity of EEG reflects  
927 socioeconomic context and geofootprint. *bioRxiv*. 2017:125872. doi: doi:  
928 <http://dx.doi.org/10.1101/125872>. .  
929

931

## Uncited References Included in Scoping Review

- 932 1. Abdalsalam ME, Yusoff MZ, Kamel N, Malik A, Meselhy M, editors. Mental  
933 task motor imagery classifications for noninvasive brain computer interface. 5th  
934 International Conference on Intelligent and Advanced Systems (ICIAS); 2014; Kuala  
935 Lumpur: IEEE. doi: 10.1109/ICIAS.2014.6869531.
- 936 2. Abdulaal MJ, Casson AJ, Gaydecki P, editors. Performance of Nested vs.  
937 Non-Nested SVM Cross-Validation Methods in Visual BCI: Validation Study. 2018  
938 26th European Signal Processing Conference (EUSIPCO); 2018; Rome: IEEE. doi:  
939 10.23919/EUSIPCO.2018.8553102.
- 940 3. Abu Kasim MA, Low CY, Ayub MA, Zakaria NAC, Salleh MHM, Johar K, et al.  
941 User-Friendly LabVIEW GUI for Prosthetic Hand Control using Emotiv EEG Headset.  
942 *Procedia Computer Science*. 2017;105:276-81. doi: 10.1016/j.procs.2017.01.222.  
943 PubMed PMID: WOS:000398830900044.
- 944 4. Aguiar S, Yáñez W, Benítez D, editors. Low complexity approach for  
945 controlling a robotic arm using the Emotiv EPOC headset. 2016 IEEE International  
946 Autumn Meeting on Power, Electronics, and Computing (ROPEC), ; 2016; Ixtapa:  
947 IEEE. doi: 10.1109/ROPEC.2016.7830526.
- 948 5. Ahmad M, Aqil M, editors. Implementation of nonlinear classifiers for adaptive  
949 autoregressive EEG features classification. 2015 Symposium on Recent Advances  
950 in Electrical Engineering (RAEE); 2015; Islamabad: IEEE. doi:  
951 10.1109/RAEE.2015.7352749.
- 952 6. Ahmad M, Aqil M, editors. QR decomposition based recursive least square  
953 adaptation of autoregressive EEG features. 2016 International Conference on  
954 Intelligent Systems Engineering (ICISE); 2016; Islamabad: IEEE. doi:  
955 10.1109/INTELSE.2016.7475176.
- 956 7. Ahmad M, Aqil M, Khan H, editors. Reducing the Computational Cost of a  
957 Classifier by Subtracting the Dual-Class Features. 2017 International Conference on  
958 Innovations in Electrical Engineering and Computational Technologies (ICIEECT);  
959 2017; Karachi. doi: 10.1109/ICIEECT.2017.7916521.
- 960 8. Al-dabag ML, Ozkurt N. EEG motor movement classification based on cross-  
961 correlation with effective channel. *Signal Image and Video Processing*.  
962 2019;13(3):567-73. doi: doi: 10.1007/s11760-018-1383-9. PubMed PMID:  
963 WOS:000463797100018.
- 964 9. Alakus TB, Turkoglu I, editors. EEG-Based Emotion Estimation with Different  
965 Deep Learning Models. 2019 4th International Conference on Computer Science and  
966 Engineering; 2019; Samsun, Turkey,. doi: 10.1109/ubmk.2019.8907135.
- 967 10. Almeahmadi A, Bourque M, El-Khatib K, editors. A tweet of the mind:  
968 Automated emotion detection for social media using brain wave pattern analysis.  
969 2013 International Conference on Social Computing (SocialCom); 2013; Alexandria,  
970 VA, USA: IEEE. doi: 10.1109/SocialCom.2013.158.
- 971 11. Almeahmadi A, El-Khatib K. On the Possibility of Insider Threat Prevention  
972 Using Intent-Based Access Control (IBAC). *Ieee Syst J*. 2017;11(2):373-84. doi:  
973 10.1109/Jsys.2015.2424677. PubMed PMID: WOS:000404985800003.
- 974 12. Alrajhi W, Alaloola D, Albarqawi A, editors. Smart home: Toward daily use of  
975 BCI-based systems. 2017 International Conference on Informatics, Health &  
976 Technology (ICIHT); 2017; Riyadh, Saudi Arabia: IEEE. doi:  
977 10.1109/ICIHT.2017.7899002.

- 978 13. Alshbatat AIN, Vial PJ, Premaratne P, Tran LC. EEG-based Brain-computer  
979 Interface for Automating Home Appliances. *Journal of Computers*. 2014;9(9):2159-  
980 66. doi: 10.4304/jcp.9.9.2159-2166. PubMed PMID: WOS:000218231100022.
- 981 14. Amarasinghe K, Wijayasekara D, Manic M, editors. EEG based brain activity  
982 monitoring using Artificial Neural Networks. 2014 7th International Conference on  
983 Human System Interactions (HSI); 2014; Costa da Caparica, Portugal: IEEE.  
984 10.1109/HSI.2014.6860449.
- 985 15. Amjad I, Toor H, Niazi IK, Afzal H, Jochumsen M, Shafique M, et al.  
986 Therapeutic effects of aerobic exercise on EEG parameters and higher cognitive  
987 functions in mild cognitive impairment patients. *International Journal of*  
988 *Neuroscience*. 2019;129(6):551-62. doi: 10.1080/00207454.2018.1551894. PubMed  
989 PMID: WOS:000462845700004.
- 990 16. Ancau D, Roman N-M, Ancau M, editors. Evaluating a Method of Offline  
991 Detection of P-3 Waves. 6th International Conference on Advancements of Medicine  
992 and Health Care through Technology, Meditech 2018; 2019; Cluj-Napoca, Romania.  
993 doi: 10.1007/978-981-13-6207-1\_22.
- 994 17. Anupama H, Cauvery N, Lingaraju G, editors. Real-time EEG based object  
995 recognition system using Brain Computer Interface. 2014 International Conference  
996 on Contemporary Computing and Informatics (IC3I); 2014; Mysore, India: IEEE. doi:  
997 10.1109/IC3I.2014.7019589.
- 998 18. Anwar SM, Saeed SMU, Majid M, editors. Classification of Expert-Novice  
999 Level of Mobile Game Players Using Electroencephalography. 2016 International  
1000 Conference on Frontiers of Information Technology (FIT); 2016; Islamabad,  
1001 Pakistan: IEEE. doi: 10.1109/FIT.2016.064.
- 1002 19. Arfaras G, Athanasiou A, Niki P, Kyriaki RK, Kartsidis P, Astaras A, et al.,  
1003 editors. Visual versus kinesthetic motor imagery for BCI control of robotic arms  
1004 (Mercury 2.0). 2017 IEEE 30th International Symposium on Computer-Based  
1005 Medical Systems (CBMS); 2017; Thessaloniki, Greece: IEEE. doi:  
1006 10.1109/CBMS.2017.34.
- 1007 20. Arias-Mora L, López-Ríos L, Céspedes-Villar Y, Velasquez-Martinez L,  
1008 Alvarez-Meza A, Castellanos-Dominguez G, editors. Kernel-based relevant feature  
1009 extraction to support motor imagery classification. 2015 20th Symposium on Signal  
1010 Processing, Images and Computer Vision (STSIVA); 2015; Bogota, Colombia: IEEE.  
1011 doi: 10.1109/STSIVA.2015.7330403.
- 1012 21. Arnau-Gonzalez P, Katsigiannis S, Ramzan N, Tolson D, Arevalillo-Herrez M,  
1013 editors. ES1D: A deep network for EEG-based subject identification. 2017 IEEE 17th  
1014 International Conference on Bioinformatics and Bioengineering (BIBE); 2017;  
1015 Washington, DC, USA: IEEE. doi: 10.1109/BIBE.2017.00-74.
- 1016 22. Arora S, Chandel SS, Chandra S, editors. An efficient multi modal emotion  
1017 recognition system: ISAMC. 2014 International Conference on the Impact of E-  
1018 Technology on US (IMPETUS); 2014; Bangalore, India: IEEE.  
1019 10.1109/IMPETUS.2014.6775870.
- 1020 23. Arvaneh M, Umiltà A, Robertson IH, editors. Filter bank common spatial  
1021 patterns in mental workload estimation. 2015 37th Annual International Conference  
1022 of the IEEE Engineering in Medicine and Biology Society (EMBC); 2015; Milan, Italy:  
1023 IEEE. doi: 10.1109/EMBC.2015.7319455.
- 1024 24. Aspinall P, Mavros P, Coyne R, Roe J. The urban brain: analysing outdoor  
1025 physical activity with mobile EEG. *British Journal of Sports Medicine*.  
1026 2015;49(4):272-6. Epub 2013/03/08. doi: 10.1136/bjsports-2012-091877. PubMed  
1027 PMID: 23467965.



- 1028 25. Athanasiou A, Arfaras G, Xygonakis I, Kartsidis P, Pandria N, Kavazidi KR, et  
1029 al., editors. Commercial BCI Control and functional brain networks in spinal cord  
1030 injury: a proof-of-concept. 2017 IEEE 30th International Symposium on Computer-  
1031 Based Medical Systems (CBMS); 2017; Thessaloniki, Greece: IEEE. doi:  
1032 10.1109/CBMS.2017.35.
- 1033 26. Azevedo AS, Jorge J, Campos P. Combining EEG Data with Place and  
1034 Plausibility Responses as an Approach to Measuring Presence in Outdoor Virtual  
1035 Environments. *Presence-Teleop Virt.* 2015;23(4):354-68. doi:  
1036 10.1162/PRES\_a\_00205. PubMed PMID: WOS:000351287300003.
- 1037 27. Baglietto Araquistain I, Garmendia X, Grana M, Asiain JdL, editors. Fusion of  
1038 Inertial Motion Sensors and Electroencephalogram for Activity Detection. 8th  
1039 International Work-Conference on the Interplay Between Natural and Artificial  
1040 Computation (IWINAC); 2019. doi: 10.1007/978-3-030-19591-5\_33.
- 1041 28. Bellman C, Martin MV, editors. Use of Machine Learning for Detection of  
1042 Unaware Facial Recognition Without Individual Training. 2017 16th IEEE  
1043 International Conference on Machine Learning and Applications (ICMLA); 2017;  
1044 Cancun, Mexico: IEEE. doi: 10.1109/ICMLA.2017.00-31.
- 1045 29. Bellman C, Martin MV, MacDonald S, editors. On the Potential of Data  
1046 Extraction by Detecting Unaware Facial Recognition with Brain-Computer Interfaces.  
1047 2018 IEEE International Conference on Cognitive Computing (ICCC); 2018 2-7 July  
1048 2018; San Francisco, CA, USA. doi: 10.1109/ICCC.2018.00022.
- 1049 30. Benitez DS, Toscano S, Silva A, editors. On the use of the Emotiv EPOC  
1050 neuroheadset as a low cost alternative for EEG signal acquisition. 2016 IEEE  
1051 Colombian Conference on Communications and Computing (COLCOM); 2016;  
1052 Cartagena, Colombia: IEEE. doi: 10.1109/ColComCon.2016.7516380.
- 1053 31. Bernays R, Mone J, Yau P, Murcia M, Gonzalez-Sanchez J, Chavez-  
1054 Echeagaray ME, et al., editors. Lost in the dark: emotion adaption. Adjunct  
1055 proceedings of the 25th annual ACM symposium on User interface software and  
1056 technology; 2012: ACM. doi: 10.1145/2380296.2380331.
- 1057 32. Beyrouthy T, Al Kork SK, Korbane JA, Abdulmonem A, editors. EEG mind  
1058 controlled smart prosthetic arm. IEEE International Conference on Emerging  
1059 Technologies and Innovative Business Practices for the Transformation of Societies  
1060 (EmergiTech); 2016; Balaclava, Mauritius: IEEE. doi:  
1061 10.1109/EmergiTech.2016.7737375.
- 1062 33. Bhatti MH, Khan J, Khan MUG, Iqbal R, Aloqaily M, Jararweh Y, et al. Soft  
1063 Computing-Based EEG Classification by Optimal Feature Selection and Neural  
1064 Networks. *IEEE Transactions on Industrial Informatics.* 2019;15(10):5747-54. doi:  
1065 10.1109/TII.2019.2925624.
- 1066 34. Bialas P, Milanowski P, editors. A high frequency steady-state visually evoked  
1067 potential based brain computer interface using consumer-grade EEG headset. 2014  
1068 36th Annual International Conference of the IEEE Engineering in Medicine and  
1069 Biology Society (EMBC); 2014; Chicago, IL, USA: IEEE. doi:  
1070 10.1109/EMBC.2014.6944857.
- 1071 35. Bilalpur M, Kia SM, Chua T-S, Subramanian R, editors. Discovering gender  
1072 differences in facial emotion recognition via implicit behavioral cues. 2017 Seventh  
1073 International Conference on Affective Computing and Intelligent Interaction (ACII);  
1074 2017; San Antonio, TX, USA: IEEE. doi: 10.1109/ACII.2017.8273588.
- 1075 36. Binias B, Myszor D, Niezabitowski M, Cyran KA, editors. Evaluation of  
1076 alertness and mental fatigue among participants of simulated flight sessions. 2016

- 1077 17th International Carpathian Control Conference (ICCC); 2016; Tatranska Lomnica,  
1078 Slovakia: IEEE. doi: 10.1109/CarpathianCC.2016.7501070.
- 1079 37. Bissoli AL, Sime MM, Bastos-Filho TF. Using sEMG, EOG and VOG to control  
1080 an intelligent environment. *IFAC-PapersOnLine*. 2016;49(30):210-5.
- 1081 38. Blaiech H, Neji M, Wali A, Alimi AM, editors. Emotion recognition by analysis  
1082 of EEG signals. 2013 13th International Conference on Hybrid Intelligent Systems  
1083 (HIS); 2013; Gammarth, Tunisia: IEEE. doi: 10.1109/HIS.2013.6920451.
- 1084 39. Bodranghien FCAA, Mahe ML, Clement S, Manto MU. A Pilot Study on the  
1085 Effects of Transcranial Direct Current Stimulation on Brain Rhythms and Entropy  
1086 during Self-Paced Finger Movement using the Eloc Helmet. *Frontiers in Human  
1087 Neuroscience*. 2017;11. doi: 10.3389/fnhum.2017.00201. PubMed PMID:  
1088 WOS:000401592200001.
- 1089 40. Bonotis PA, Tsouros DC, Smyrlis PN, Tzallas AT, Giannakeas N, Glavas E, et  
1090 al. Automated Assessment of Pain Intensity Based on EEG Signal Analysis. 2019  
1091 IEEE 19th International Conference on Bioinformatics and Bioengineering (BIBE).  
1092 2019:583-8. doi: 10.1109/bibe.2019.00111. PubMed PMID: INSPEC:19243626.
- 1093 41. Borisov V, Syskov A, Kublanov V, editors. Functional State Assessment of an  
1094 Athlete by Means of the Brain-Computer Interface Multimodal Metrics. *World  
1095 Congress on Medical Physics and Biomedical Engineering*; 2018; Singapore. doi:  
1096 10.1007/978-981-10-9023-3\_13.
- 1097 42. Borisov V, Syskov A, Kublanov V, editors. Functional State Assessment of an  
1098 Athlete by Means of the Brain-Computer Interface Multimodal Metrics. *World  
1099 Congress on Medical Physics and Biomedical Engineering* 2018; 2019. doi:  
1100 10.1007/978-981-10-9023-3\_13.
- 1101 43. Borisov V, Syskov A, Tetervak V, Kublanov V, editors. Mobile brain-computer  
1102 interface application for mental status evaluation. 2017 International Multi-  
1103 Conference on Engineering, Computer and Information Sciences (SIBIRCON); 2017;  
1104 Novosibirsk, Russia: IEEE. doi: 10.1109/SIBIRCON.2017.8109952.
- 1105 44. Bousseta R, El Ouakouak I, Gharbi M, Regragui F. EEG Based Brain  
1106 Computer Interface for Controlling a Robot Arm Movement Through Thought. *IRBM*.  
1107 2018;39(2):129-35. doi: <http://dx.doi.org/10.1016/j.irbm.2018.02.001>.
- 1108 45. Bousseta R, Tayeb S, El Ouakouak I, Gharbi M, Regragui F, Himmi MM,  
1109 editors. EEG efficient classification of imagined hand movement using RBF kernel  
1110 SVM. 2016 11th International Conference on Intelligent Systems: Theories and  
1111 Applications (SITA); 2016; Mohammedia, Morocco: IEEE. doi:  
1112 10.1109/SITA.2016.7772278.
- 1113 46. Brennan C, McCullagh P, Lightbody G, Galway L, Feuser D, González JL, et  
1114 al., editors. Accessing tele-services using a hybrid bci approach. *International Work-  
1115 Conference on Artificial Neural Networks*; 2015; Palma de Mallorca, Spain: Springer.
- 1116 47. Browarska N, Stach T, editors. System to Communicate Disabled People with  
1117 Environment Using Brain-Computer Interfaces. 3rd International Scientific  
1118 Conference on Brain-Computer Interfaces; 2018; Opole, Poland. 10.1007/978-3-319-  
1119 75025-5\_14.
- 1120 48. Bustomi A, Wijaya S, Prawito, editors. Analyzing power spectral of  
1121 electroencephalogram (EEG) signal to identify motoric arm movement using  
1122 EMOTIV EPOC+. *International Symposium on Current Progress in Mathematics and  
1123 Sciences 2016 (ISCPMS 2016)*; 2017; Depok, Indonesia: AIP Publishing.  
1124 <https://doi.org/10.1063/1.4991175>.
- 1125 49. Caesarendra W, Ariyanto M, Lexon SU, Pasmanasari ED, Chang CR,  
1126 Setiawan JD, editors. EEG based pattern recognition method for classification of

- 1127 different mental tasking: Preliminary study for stroke survivors in Indonesia.  
1128 Automation, Cognitive Science, Optics, Micro Electro-Mechanical System, and  
1129 Information Technology (ICACOMIT), 2015 International Conference on; 2015;  
1130 Bandung, Indonesia: IEEE. doi: 10.1109/ICACOMIT.2015.7440193.  
1131 50. Camelo GA, Menezes ML, Sant'Anna AP, Vicari RM, Pereira CE, editors.  
1132 Control of Smart Environments Using Brain Computer Interface Based on Genetic  
1133 Algorithm. Asian Conference on Intelligent Information and Database Systems;  
1134 2016; Da Nang, Vietnam: Springer.  
1135 51. Carabalona R, Grossi F, Tessadri A, Castiglioni P, Caracciolo A, de Munari I.  
1136 Light on! Real world evaluation of a P300-based brain-computer interface (BCI) for  
1137 environment control in a smart home. *Ergonomics*. 2012;55(5):552-63. Epub  
1138 2012/03/30. doi: 10.1080/00140139.2012.661083. PubMed PMID: 22455346.  
1139 52. Carrillo I, Meza-Kubo V, Morán AL, Galindo G, García-Canseco E, editors.  
1140 Processing EEG signals towards the construction of a user experience assessment  
1141 method. First International Conference Ambient Intelligence for Health; 2015; Puerto  
1142 Varas, Chile: Springer.  
1143 53. Cernea D, Olech P-S, Ebert A, Kerren AJK-KI. Measuring subjectivity. *KI-*  
1144 *Künstliche Intelligenz*. 2012;26(2):177-82.  
1145 54. Chamanzar A, Malekmohammadi A, Bahrani M, Shabany M, editors. Accurate  
1146 single-trial detection of movement intention made possible using adaptive wavelet  
1147 transform. 2015 37th Annual International Conference of the IEEE Engineering in  
1148 Medicine and Biology Society (EMBC); 2015; Milan, Italy: IEEE. doi:  
1149 10.1109/EMBC.2015.7318757.  
1150 55. Charisis V, Hadjidimitriou S, Hadjileontiadis L, Uğurca D, Yilmaz E, editors.  
1151 EmoActivity-An EEG-based gamified emotion HCI for augmented artistic expression:  
1152 The i-Treasures paradigm. International Conference on Universal Access in Human-  
1153 Computer Interaction; 2015; Los Angeles, CA, USA: Springer.  
1154 56. Chew O, Robinson N, Gopi S, editors. Covert Visuospatial Attention (VSA) for  
1155 EEG-Based Asynchronous Control of Robot. 2018 IEEE International Conference on  
1156 Systems, Man, and Cybernetics (SMC); 2018 7-10 Oct. 2018; Miyazaki, Japan.  
1157 10.1109/SMC.2018.00100.  
1158 57. Chiuzbaian A, Jakobsen J, Puthusserypady S, editors. Mind Controlled  
1159 Drone: An Innovative Multiclass SSVEP based Brain Computer Interface. 2019 7th  
1160 International Winter Conference on Brain-Computer Interface (BCI); 2019 18-20 Feb.  
1161 2019; Gangwon, Korea. 10.1109/IWW-BCI.2019.8737327.  
1162 58. Choo A, May A, editors. Virtual mindfulness meditation: Virtual reality and  
1163 electroencephalography for health gamification. 2014 IEEE Games Media  
1164 Entertainment (GEM); 2014; Toronto, ON, Canada: IEEE. doi:  
1165 10.1109/GEM.2014.7048076.  
1166 59. Chowdhury P, Shakim SK, Karim MR, Rhaman MK, editors. Cognitive  
1167 efficiency in robot control by Emotiv EPOC. 2014 International Conference on  
1168 Informatics, Electronics & Vision (ICIEV); 2014; Dhaka, Bangladesh: IEEE. doi:  
1169 10.1109/ICIEV.2014.6850775.  
1170 60. Chumerin N, Manyakov NV, van Vliet M, Robben A, Combaz A, Van Hulle  
1171 MM. Steady-State Visual Evoked Potential-Based Computer Gaming on a  
1172 Consumer-Grade EEG Device. *Ieee T Comp Intel Ai*. 2013;5(2):100-10. doi:  
1173 10.1109/Tciaig.2012.2225623. PubMed PMID: WOS:000320582000003.  
1174 61. Chynal P, Sobecki J, Rymarz M, Kilijanska B, editors. Shopping behaviour  
1175 analysis using eyetracking and EEG. 9th International Conference on Human  
1176 System Interactions; 2016; Portsmouth, UK: IEEE. doi: 10.1109/HSI.2016.7529674.

- 1177 62. Clemente M, Rodriguez A, Rey B, Alcaniz M. Measuring presence during the  
1178 navigation in a virtual environment using EEG. *Annual Review of Cybertherapy and*  
1179 *Telemedicine*. 2013;191:136.
- 1180 63. Clemente M, Rodriguez A, Rey B, Alcaniz M. Assessment of the influence of  
1181 navigation control and screen size on the sense of presence in virtual reality using  
1182 EEG. *Expert Systems with Applications*. 2014;41(4):1584-92. doi:  
1183 10.1016/j.eswa.2013.08.055. PubMed PMID: WOS:000329955900006.
- 1184 64. Comaniciu AN, L., editor *Enabling Communication for Locked-in Syndrome*  
1185 *Patients using Deep Learning and an Emoji-based Brain Computer Interface*. 2018  
1186 *IEEE Biomedical Circuits and Systems Conference (BioCAS)*; 2018 17-19 Oct. 2018.  
1187 10.1109/BIOCAS.2018.8584821.
- 1188 65. Das A, Leong TT, Suresh S, Sundararajan N, editors. *Meta-cognitive interval*  
1189 *type-2 fuzzy controller for quadcopter flight control-an EEG based approach*. 2016  
1190 *IEEE International Conference on Fuzzy Systems (FUZZ-IEEE)*; 2016; Vancouver,  
1191 BC, Canada: IEEE. doi: 10.1109/FUZZ-IEEE.2016.7738008.
- 1192 66. Dhanapala W, Bakmeedeniya A, Amarakeerthi S, Jayaweera P, Sumathipala  
1193 S, editors. *A brain signal-based credibility assessment approach*. 2017 *Joint 17th*  
1194 *World Congress of International Fuzzy Systems Association and 9th International*  
1195 *Conference on Soft Computing and Intelligent Systems (IFSA-SCIS)*; 2017; Otsu,  
1196 Japan: IEEE. doi: 10.1109/IFSA-SCIS.2017.8305563.
- 1197 67. Dharmasena S, Lalitharathne K, Dissanayake K, Sampath A, Pasqual A,  
1198 editors. *Online classification of imagined hand movement using a consumer grade*  
1199 *EEG device*. 2013 *8th IEEE International Conference on Industrial and Information*  
1200 *Systems (ICIIS)*; 2013; Peradeniya, Sri Lanka: IEEE. doi:  
1201 10.1109/ICIIInfS.2013.6732041.
- 1202 68. Dimitrov GP, Aleksiev KV, Garvanova M, Dimitrova I, Kovatcheva E, editors.  
1203 *Identification of EEG Brain Waves Obtained by Emotive Device*. 2019 *9th*  
1204 *International Conference on Advanced Computer Information Technologies (ACIT)*;  
1205 2019 5-7 June 2019. 10.1109/ACITT.2019.8779861.
- 1206 69. Dimitrov GP, Kostadinova IS, Panayotova G, Petrova P, Aleksiev KV, Oleksii  
1207 B, et al., editors. *Using Mixed Linear Programming to Classify BCI Signals*  
1208 *Submission*. 2019 *IEEE 60th International Scientific Conference on Power and*  
1209 *Electrical Engineering of Riga Technical University*; 2019.  
1210 10.1109/rtucon48111.2019.8982368.
- 1211 70. Dkhil MB, Neji M, Wali A, Alimi AM, editors. *A new approach for a safe car*  
1212 *assistance system*. 2015 *4th International Conference on Advanced Logistics and*  
1213 *Transport (ICALT)*; 2015; Valenciennes, France: IEEE. doi:  
1214 10.1109/ICAdLT.2015.7136627.
- 1215 71. Dutta S, Hazra S, Nandy A, editors. *Human Cognitive State Classification*  
1216 *Through Ambulatory EEG Signal Analysis*. *Artificial Intelligence and Soft Computing*,  
1217 *ICAISC 2019*; 2019; Zakopane, Poland. doi: 10.1007/978-3-030-20915-5\_16.
- 1218 72. Elsayy AS, Eldawlatly S, Taher M, Aly GM, editors. *Performance analysis of a*  
1219 *Principal Component Analysis ensemble classifier for Emotiv headset P300 spellers*.  
1220 *2014 36th Annual International Conference of the IEEE Engineering in Medicine and*  
1221 *Biology Society (EMBC)*; 2014; Chicago, IL, USA: IEEE. doi:  
1222 10.1109/EMBC.2014.6944755.
- 1223 73. Elsayy AS, Eldawlatly S, Taher M, Aly GM, editors. *Enhancement of mobile*  
1224 *development of brain-computer platforms*. 2015 *IEEE International Conference on*  
1225 *Electronics, Circuits, and Systems (ICECS)*; 2015; Cairo, Egypt: IEEE. doi:  
1226 10.1109/ICECS.2015.7440355.

- 1227 74. Espiritu NMD, Chen SAC, Blasa TAC, Munsayac FET, Arenos RP, Baldovino  
1228 RG, et al., editors. BCI-controlled Smart Wheelchair for Amyotrophic Lateral  
1229 Sclerosis Patients. 2019 7th International Conference on Robot Intelligence  
1230 Technology and Applications (RiTA); 2019 1-3 Nov. 2019; Daejeon, Korea. doi:  
1231 10.1109/RITAPP.2019.8932748.
- 1232 75. Fakhruzzaman MN, Riksakomara E, Suryotrisongko H. EEG Wave  
1233 Identification in Human Brain with Emotiv EPOC for Motor Imagery. *Procedia  
1234 Computer Science*. 2015;72:269-76. doi: 10.1016/j.procs.2015.12.140. PubMed  
1235 PMID: WOS:000373775700033.
- 1236 76. Falkowska J, Sobiecki J, Pietrzak M, editors. Eye tracking usability testing  
1237 enhanced with EEG analysis. *International Conference of Design, User Experience,  
1238 and Usability*; 2016; Toronto, Canada: Springer. doi: 10.1007/978-3-319-40409-7.
- 1239 77. Fatima M, Amjad N, Shafique M, editors. Analysis of Electroencephalographic  
1240 Signal Acquisition and Processing for Use in Robotic Arm Movement. 2018 IEEE-  
1241 EMBS Conference on Biomedical Engineering and Sciences (IECBES); 2018;  
1242 Sarawak, Malaysia: IEEE. doi: 10.1109/IECBES.2018.8626663.
- 1243 78. Fattouh A, Albidewi I, BATERFI B, editors. EEG-based emotion recognition of  
1244 Quran listeners. *3rd International Conference on Computing for Sustainable Global  
1245 Development (INDIACom)*; 2016; New Delhi, India: IEEE. Retrieved from  
1246 <https://ieeexplore.ieee.org/document/7724483>.
- 1247 79. Fernandez X, García R, Ferreira E, Menendez J, editors. Classification of  
1248 Basic Human Emotions from Electroencephalography Data. *Iberoamerican  
1249 Congress on Pattern Recognition*; 2015; Montevideo, Uruguay: Springer.
- 1250 80. Fernandez-Fraga SM, Aceves-Fernandez MA, Pedraza-Ortega JC. EEG data  
1251 collection using visual evoked, steady state visual evoked and motor image task,  
1252 designed to brain computer interfaces (BCI) development. *Data in Brief*. 2019;25.  
1253 doi: 10.1016/j.dib.2019.103871. PubMed PMID: WOS:000495104500006.
- 1254 81. Friedman D, Shapira S, Jacobson L, Gruberger M, editors. A data-driven  
1255 validation of frontal EEG asymmetry using a consumer device. *2015 International  
1256 Conference on Affective Computing and Intelligent Interaction (ACII)*; 2015; Xi'an,  
1257 China: IEEE. doi: 10.1109/ACII.2015.7344686.
- 1258 82. Gaber A, Ghazali M, Iahad NA, Wadha B. USABILITY TESTING ON  
1259 MOTIONMOUSE: A PROTOTYPE TO CONTROL ANDROID TABLET USING  
1260 EMOTIV EPOC. *Malaysian Journal of Computer Science*. 2019:73-86. doi:  
1261 10.22452/mjcs.sp2019no3.5. PubMed PMID: WOS:000505031800005.
- 1262 83. George K, Iniguez A, Donze H, editors. Sensing and decoding of visual stimuli  
1263 using commercial Brain Computer Interface technology. *2014 IEEE International  
1264 Instrumentation and Measurement Technology Conference (I2MTC) Proceedings;  
1265 2014; Montevideo, Uruguay: IEEE. doi: 10.1109/I2MTC.2014.6860913.*
- 1266 84. George K, Iniguez A, Donze H, editors. Automated sensing, interpretation and  
1267 conversion of facial and mental expressions into text acronyms using brain-computer  
1268 interface technology. *2014 IEEE International Instrumentation and Measurement  
1269 Technology Conference (I2MTC) Proceedings; 2014; Montevideo, Uruguay: IEEE.  
1270 doi: 10.1109/I2MTC.2014.6860944.*
- 1271 85. George K, Iniguez A, Donze H, Kizhakkumthala S, editors. Design,  
1272 implementation and evaluation of a brain-computer interface controlled mechanical  
1273 arm for rehabilitation. *2014 IEEE International Instrumentation and Measurement  
1274 Technology Conference (I2MTC) Proceedings; 2014; Montevideo, Uruguay: IEEE.  
1275 doi: 10.1109/I2MTC.2014.6860961.*

- 1276 86. Ghasemy H, Momtazpour M, Sardouie SH, editors. Detection of Sustained  
1277 Auditory Attention in Students with Visual Impairment. 2019 27th Iranian Conference  
1278 on Electrical Engineering (ICEE); 2019 30 April-2 May 2019; Yazd, Iran. doi:  
1279 10.1109/IranianCEE.2019.8786565.
- 1280 87. Gomez-Lopez P, Montero F, Lopez MT, editors. Empowering UX of Elderly  
1281 People with Parkinson's Disease via BCI Touch. 8th International Work-Conference  
1282 on the Interplay Between Natural and Artificial Computation (IWINAC); 2019;  
1283 Almeria, Spain. doi: 10.1007/978-3-030-19591-5\_17.
- 1284 88. Gull MA, Elahi H, Marwae M, Waqar S, editors. A New Approach to  
1285 Classification of Upper Limb and Wrist Movements Using Eeg Signals. 13th IASTED  
1286 International Conference on Biomedical Engineering; 2017; Innsbruck, Austria.  
1287 10.2316/P.2017.852-049.
- 1288 89. Haddad RR, Bastos-Filho TF, Tello RJMG, editors. A Novel Digital Speller  
1289 Based on a Hybrid Brain Computer Interface (hBCI) SSVEP with Eye Tracking. XXVI  
1290 Brazilian Congress on Biomedical Engineering; 2019; Armacao de Buzio, Brazil. doi:  
1291 10.1007/978-981-13-2119-1\_92.
- 1292 90. Hanh NTH, Tuan HV, editors. Identification Of Some Brain Waves Signal And  
1293 Applications. 12th IEEE Conference on Industrial Electronics and Applications  
1294 (ICIEA); 2017; Siem Reap, Cambodia. doi: 10.1109/ICIEA.2017.8283061.
- 1295 91. Hazrati MK, Hofmann UG, editors. Avatar navigation in Second Life using  
1296 brain signals. 2013 IEEE 8th International Symposium on Intelligent Signal  
1297 Processing (WISP); 2013; Funchal, Portugal: IEEE. doi:  
1298 10.1109/WISP.2013.6657473.
- 1299 92. Heger D, Putze F, Schultz T, editors. Online recognition of facial actions for  
1300 natural EEG-based BCI applications. Fourth International Conference on Affective  
1301 Computing and Intelligent Interaction; 2011; Memphis, TN, USA: Springer. Retrieved  
1302 from: [https://link.springer.com/chapter/10.1007/978-3-642-24571-8\\_56](https://link.springer.com/chapter/10.1007/978-3-642-24571-8_56).
- 1303 93. Hjorungdal R-M, Sanfilippo F, Osen O, Rutle A, Bye RT, editors. A game-  
1304 based learning framework for controlling brain-actuated wheelchairs. 30th European  
1305 Conference on Modelling and Simulation; 2016; Regensburg, Germany,: ECMS  
1306 European Council for Modelling and Simulation. Retrieved from:  
1307 [https://ntnuopen.ntnu.no/ntnu-](https://ntnuopen.ntnu.no/ntnu-xmlui/bitstream/handle/11250/2498925/ECMS2016Wheelchair.pdf?sequence=1)  
1308 [xmlui/bitstream/handle/11250/2498925/ECMS2016Wheelchair.pdf?sequence=1](https://ntnuopen.ntnu.no/ntnu-xmlui/bitstream/handle/11250/2498925/ECMS2016Wheelchair.pdf?sequence=1).
- 1309 94. Holewa K, Nawrocka A, editors. Emotiv EPOC neuroheadset in brain-  
1310 computer interface. 2014 15th International Carpathian Control Conference (ICCC);  
1311 2014; Velke Karlovice, Czech Republic: IEEE. doi:  
1312 10.1109/CarpathianCC.2014.6843587.
- 1313 95. Hooda N, Kumar N. Cognitive Imagery Classification of EEG Signals using  
1314 CSP-based Feature Selection Method. IETE Technical Review. 2019. doi:  
1315 10.1080/02564602.2019.1620138. PubMed PMID: WOS:000472308200001.
- 1316 96. Hooda N, Kumar N, editors. Multi-task Classification scheme for Cognitive  
1317 Imagery EEG Acquired using a Commercial Wireless Headset. 2019 3rd  
1318 International conference on Electronics, Communication and Aerospace Technology  
1319 (ICECA); 2019; Coimbatore, India. doi: 10.1109/ICECA.2019.8822097.
- 1320 97. Hou JY, Li YL, Liu HM, Wang SJ, editors. Improving the P300-based Brain-  
1321 computer Interface with Transfer Learning. 2017 8th International IEEE/EMBS  
1322 Conference on Neural Engineering (NER); 2017; Shanghai, China. doi:  
1323 10.1109/NER.2017.8008395.
- 1324 98. Hsieh C-H, Chu H-P, Huang Y-H, editors. An HMM-based eye movement  
1325 detection system using EEG brain-computer interface. 2014 IEEE International

- 1326 Symposium on Circuits and Systems (ISCAS); 2014; Melbourne VIC, Australia:  
1327 IEEE. doi: 10.1109/ISCAS.2014.6865222.
- 1328 99. Hsieh C-H, Huang Y-H, editors. Low-complexity EEG-based eye movement  
1329 classification using extended moving difference filter and pulse width demodulation.  
1330 2015 37th Annual International Conference of the IEEE Engineering in Medicine and  
1331 Biology Society (EMBC); 2015; Milan, Italy: IEEE. doi:  
1332 10.1109/EMBC.2015.7320062.
- 1333 100. Huang CK, Wang ZW, Chen GW, Yang CY, editors. Development of a Smart  
1334 Wheelchair with Dual Functions: Real-time Control and Automated Guide. 2nd  
1335 International Conference on Control and Robotics Engineering; 2017; Bangkok,  
1336 Thailand. doi: 10.1109/ICCRE.2017.7935045.
- 1337 101. Huang Z, Javaid A, Devabhaktuni VK, Li Y, Yang X. Development of  
1338 Cognitive Training Program With EEG Headset. IEEE Access. 2019;7:126191-200.  
1339 doi: 10.1109/ACCESS.2019.2937866.
- 1340 102. Hurtado-Rincon J, Rojas-Jaramillo S, Ricardo-Cespedes Y, Alvarez-Meza  
1341 AM, Castellanos-Dominguez G, editors. Motor imagery classification using feature  
1342 relevance analysis: An Emotiv-based BCI system. 2014 XIX Symposium on Image,  
1343 Signal Processing and Artificial Vision; 2014; Armenia, Colombia: IEEE. doi:  
1344 10.1109/STSIVA.2014.7010165.
- 1345 103. Hwang T, Kim M, Hwangbo M, Oh E, editors. Optimal set of EEG electrodes  
1346 for real-time cognitive workload monitoring. 18th IEEE International Symposium on  
1347 Consumer Electronics; 2014; JeJu Island, South Korea: IEEE. doi:  
1348 10.1109/ISCE.2014.6884536.
- 1349 104. Hwang T, Kim M, Hwangbo M, Oh E, editors. Comparative analysis of  
1350 cognitive tasks for modeling mental workload with electroencephalogram. 36th  
1351 Annual International Conference of the IEEE Engineering in Medicine and Biology  
1352 Society; 2014; Chicago, IL, USA: IEEE. doi: 10.1109/EMBC.2014.6944170.
- 1353 105. Jacoby JD, Tory M, Tanaka J, editors. Evoked response potential training on  
1354 a consumer EEG headset. 2015 IEEE Pacific Rim Conference on Communications,  
1355 Computers and Signal Processing (PACRIM); 2015; Victoria, BC, Canada: IEEE.  
1356 doi: 10.1109/PACRIM.2015.7334885.
- 1357 106. Jadav GM, Batistic L, Vlahinic S, Vrankic M, editors. Brain Computer Interface  
1358 Communicator : A Response to Auditory Stimuli Experiment. 2017 40th International  
1359 Convention on Information and Communication Technology, Electronics and  
1360 Microelectronics (MIPRO); 2017; Opatija, Croatia. doi:  
1361 10.23919/MIPRO.2017.7973461.
- 1362 107. Jadhav N, Manthalkar R, Joshi Y. Effect of meditation on emotional response:  
1363 An EEG-based study. Biomedical Signal Processing and Control. 2017;34:101-13.  
1364 doi: 10.1016/j.bspc.2017.01.008. PubMed PMID: WOS:000397549100011.
- 1365 108. Jadhav N, Manthalkar R, Joshi Y, editors. Assessing Effect of meditation on  
1366 Cognitive workload using EEG signals. 2017 Second International Workshop on  
1367 Pattern Recognition; 2017; Singapore. doi: 10.1117/12.2280312.
- 1368 109. Johar KL, C. Y.; hanapiah, F. A.; Jaffar, A.; Idris, F.; Kasim, M. A. A. Towards  
1369 the development of a electro-encephalography based neuroprosthetic terminal  
1370 device. Jurnal Teknologi. 2015;76(4).
- 1371 110. Jumphoo T, Uthansakul M, Uthansakul P. Brainwave classification without the  
1372 help of limb movement and any stimulus for character-writing application. Cognitive  
1373 Systems Research. 2019;58:375-86. doi:  
1374 <http://dx.doi.org/10.1016/j.cogsys.2019.09.002>.

- 1375 111. Jun G, Smitha KG, editors. EEG based stress level identification. 2016 IEEE  
1376 International Conference on Systems, Man, and Cybernetics (SMC); 2016;  
1377 Budapest, Hungary: IEEE. doi: 10.1109/SMC.2016.7844738.
- 1378 112. Kaewsutas M, Sarikaphuti A, Nararatwanchai T, Sittiprapaporn P, Patchanee  
1379 P. Electroencephalographic study of microalgae DHA omega-3 egg consumption on  
1380 cognitive function. *Journal of Functional Foods*. 2017;29:46-52. doi:  
1381 10.1016/j.jff.2016.12.004. PubMed PMID: WOS:000393847800006.
- 1382 113. Kawala-Janik A, Podpora M, Gardecki A, Czuczvara W, Baranowski J, Bauer  
1383 W, editors. Game controller based on biomedical signals. 2015 20th International  
1384 Conference on Methods and Models in Automation and Robotics (MMAR); 2015;  
1385 Miedzyzdroje, Poland: IEEE. doi: 10.1109/MMAR.2015.7284003.
- 1386 114. Kaysa WA, Widyotriatmo A, editors. Design of Brain-computer interface  
1387 platform for semi real-time commanding electrical wheelchair simulator movement.  
1388 2013 3rd International Conference on Instrumentation Control and Automation (ICA);  
1389 2013; Ungasan, Indonesia: IEEE. doi: 10.1109/ICA.2013.6734043.
- 1390 115. Kha HH, editor Real-time brainwave-controlled interface using P300  
1391 component in EEG signal processing. 2016 IEEE RIVF International Conference on  
1392 Computing & Communication Technologies, Research, Innovation, and Vision for the  
1393 Future (RIVF); 2016; Hanoi, Vietnam: IEEE. doi: 10.1109/RIVF.2016.7800300.
- 1394 116. Kha HH, Kha VA, Hung DQ, editors. Brainwave-controlled applications with  
1395 the Emotiv EPOC using support vector machine. 2016 3rd International Conference  
1396 on Information Technology, Computer, and Electrical Engineering (ICITACEE); 2016;  
1397 Semarang, Indonesia: IEEE. doi: 10.1109/ICITACEE.2016.7892420.
- 1398 117. Khai LQ, Anh DTN, Bao TH, Linh HQ, editors. Application of portable  
1399 electroencephalograph device in controlling and identifying emotion. 2016  
1400 International Conference on Biomedical Engineering (BME-HUST); 2016; Hanoi,  
1401 Vietnam: IEEE. doi: 10.1109/BME-HUST.2016.7782097.
- 1402 118. Khalafallah A, Ibrahim A, Shehab B, Raslan H, Eltobgy O, Elbaroudy S,  
1403 editors. A Pragmatic Authentication System Using Electroencephalography Signals.  
1404 2018 IEEE International Conference on Acoustics, Speech and Signal Processing  
1405 (ICASSP); 2018; Calgary, AB, Canada: IEEE. doi: 10.1109/ICASSP.2018.8461659.
- 1406 119. Khan J, Bhatti MH, Khan UG, Iqbal R. Multiclass EEG motor-imagery  
1407 classification with sub-band common spatial patterns. *Eurasip Journal on Wireless  
1408 Communications and Networking*. 2019. doi: 10.1186/s13638-019-1497-y. PubMed  
1409 PMID: WOS:000474211200001.
- 1410
- 1411 120. Khan QA, Hassan A, Rehman S, Riaz F, editors. Detection and Classification  
1412 of Pilots Cognitive State using EEG. 2017 2nd IEEE International Conference on  
1413 Computational Intelligence and Applications (ICCI); 2017; Beijing, China. doi:  
1414 10.1109/CIAPP.2017.8167249.
- 1415 121. Khan ZH, Hussain N, Tiwana MI. Classification of EEG signals for wrist and  
1416 grip movements using echo state network. *Biomedical Research*. 2017;28(3):1095-  
1417 102. doi: Retrieved from: [https://www.biomedres.info/biomedical-  
1418 research/classification-of-eeg-signals-for-wrist-and-grip-movements-using-echo-  
1419 state-network.html](https://www.biomedres.info/biomedical-research/classification-of-eeg-signals-for-wrist-and-grip-movements-using-echo-state-network.html). PubMed PMID: WOS:000396822900020.
- 1420 122. Khelifa MMB, Lamti HA, Grillasca J, editors. A gaze/SSVEP based  
1421 Wheelchair Command. 2018 IEEE/ACS 15th International Conference on Computer  
1422 Systems and Applications (AICCSA); 2018; Aqaba, Jordan: IEEE. doi:  
1423 10.1109/AICCSA.2018.8612850.



- 1424 123. Khushaba RN, Greenacre L, Kodagoda S, Louviere J, Burke S, Dissanayake  
1425 G. Choice modeling and the brain: A study on the Electroencephalogram (EEG) of  
1426 preferences. *Expert Systems with Applications*. 2012;39(16):12378-88. doi:  
1427 10.1016/j.eswa.2012.04.084. PubMed PMID: WOS:000307796300010.
- 1428 124. Khushaba RN, Kodagoda S, Dissanayake G, Greenacre L, Burke S, Louviere  
1429 J, editors. A neuroscientific approach to choice modeling: Electroencephalogram  
1430 (EEG) and user preferences. *The 2012 International Joint Conference on Neural  
1431 Networks (IJCNN)*; 2012; Brisbane, QLD, Australia: IEEE. doi:  
1432 10.1109/IJCNN.2012.6252561.
- 1433 125. Kimmattkar NV, Babu BV, editors. Initial analysis of brain EEG signal for  
1434 mental state detection of human being. *2017 International Conference on Trends in  
1435 Electronics and Informatics (ICEI)*; 2017; Tirunelveli, India: IEEE. doi:  
1436 10.1109/ICOEI.2017.8300934.
- 1437 126. Kline A, Desai J, editors. SIMULINK® based robotic hand control using  
1438 Emotiv™ EEG headset. *2014 40th Annual Northeast Bioengineering Conference  
1439 (NEBEC)*; 2014; Boston, MA, USA: IEEE. doi: 10.1109/NEBEC.2014.6972839.
- 1440 127. Koike-Akino T, Mahajan R, Marks TK, Wang Y, Watanabe S, Tuzel O, et al.,  
1441 editors. High-accuracy user identification using EEG biometrics. *2016 38th Annual  
1442 International Conference of the IEEE Engineering in Medicine and Biology Society  
1443 (EMBC)*; 2016; Orlando, FL, USA: IEEE. doi: 10.1109/EMBC.2016.7590835.
- 1444 128. Koles M, Szegletes L, Forstner B, editors. Towards a physiology based  
1445 difficulty control system for serious games. *2015 6th IEEE International Conference  
1446 on Cognitive Infocommunications (CogInfoCom)*; 2015; Gyor, Hungary: IEEE. doi:  
1447 10.1109/CogInfoCom.2015.7390612.
- 1448 129. Kosinski J, Szklanny K, Wieczorkowska A, Wichrowski M, editors. An Analysis  
1449 of Game-Related Emotions Using EMOTIV EPOC. *Proceedings of the 2018  
1450 Federated Conference on Computer Science and Information Systems*; 2018.  
1451 10.15439/2018f296.
- 1452 130. Kotowski K, Stapor K, Leski J. Improved robust weighted averaging for event-  
1453 related potentials in EEG. *Biocybernetics and Biomedical Engineering*.  
1454 2019;39(4):1036-46. doi: 10.1016/j.bbe.2019.09.002. PubMed PMID:  
1455 WOS:000501571700007.
- 1456 131. Kubacki A, Jakubowski A, Rybarczyk D, Owczarek P, editors. Controlling the  
1457 direction of rotation of the motor using brain waves via Ethernet POWERLINK  
1458 protocol. *Challenges in Automation, Robotics and Measurement Techniques*; 2016;  
1459 Warsaw, Poland: Springer. doi: 10.1007/978-3-319-29357-8.
- 1460 132. Kubacki A, Jakubowski A, Sawicki Ł, editors. Detection of artefacts from the  
1461 motion of the eyelids created during EEG research using artificial neural network.  
1462 *Challenges in Automation, Robotics and Measurement Techniques*; 2016; Warsaw,  
1463 Poland: Springer. doi: 10.1007/978-3-319-29357-8.
- 1464 133. Kubacki A, Sawicki L, Owczarek P, editors. Detection of facial gestures  
1465 artefacts created during an EEG research using artificial neural networks. *2016 21st  
1466 International Conference on Methods and Models in Automation and Robotics  
1467 (MMAR)*; 2016; Miedzyzdroje, Poland: IEEE. doi: 10.1109/MMAR.2016.7575236.
- 1468 134. Kucukyildiz G, Ocak H, Karakaya S, Sayli O. Design and Implementation of a  
1469 Multi Sensor Based Brain Computer Interface for a Robotic Wheelchair. *J Intell  
1470 Robot Syst*. 2017;87(2):247-63. doi: 10.1007/s10846-017-0477-x. PubMed PMID:  
1471 WOS:000404671900004.  
1472

- 1473 135. Kuremoto T, Baba Y, Obayashi M, Mabu S, Kobayashi K, editors. To  
1474 extraction the feature of EEG signals for mental task recognition. 2015 54th Annual  
1475 Conference of the Society of Instrument and Control Engineers of Japan (SICE);  
1476 2015; Hangzhou, China: IEEE. doi: 10.1109/SICE.2015.7285468.
- 1477 136. Lamti HA, Khelifa MMB, Alimi AM, Gorce P, editors. Influence of mental  
1478 fatigue on P300 and SSVEP during virtual wheelchair navigation. 2014 36th Annual  
1479 International Conference of the IEEE Engineering in Medicine and Biology Society;  
1480 2014; Chicago, IL, USA: IEEE. doi: 10.1109/EMBC.2014.6943825.
- 1481 137. Lange G, Low CY, Johar K, Hanapiah FA, Kamaruzaman F. Classification of  
1482 Electroencephalogram Data from Hand Grasp and Release Movements for BCI  
1483 Controlled Prosthesis. *Procedia Technology*. 2016;26:374-81. doi: doi:  
1484 10.1016/j.protcy.2016.08.048.
- 1485 138. Li BR, Wang Y, Wang KS. A novel method for the evaluation of fashion  
1486 product design based on data mining. *Adv Manuf*. 2017;5(4):370-6. doi:  
1487 10.1007/s40436-017-0201-x. PubMed PMID: WOS:000417945200007.
- 1488 139. Li M, Zhang Y, Zhang H, Hu HS. An EEG based control system for intelligent  
1489 wheelchair. *Applied Mechanics and Materials*. 2013;300:1540-5. doi:  
1490 <https://doi.org/10.4028/www.scientific.net/amm.300-301.1540>.
- 1491 140. Li YT, Zhou G, Graham D, Holtzhauer A. Towards an EEG-based brain-  
1492 computer interface for online robot control. *Multimedia Tools and Applications*.  
1493 2016;75(13):7999-8017. doi: 10.1007/s11042-015-2717-z. PubMed PMID:  
1494 WOS:000379924600026.
- 1495 141. Liarokapis F, Debattista K, Vourvopoulos A, Petridis P, Ene A. Comparing  
1496 interaction techniques for serious games through brain-computer interfaces: A user  
1497 perception evaluation study. *Entertainment Computing*. 2014;5(4):391-9. doi:  
1498 10.1016/j.entcom.2014.10.004. PubMed PMID: WOS:000214855100022.
- 1499 142. Liarokapis F, Vourvopoulos A, Ene A, editors. Examining user experiences  
1500 through a multimodal BCI puzzle game. 2015 19th International Conference on  
1501 Information Visualisation; 2015; Barcelona, Spain: IEEE. doi: 10.1109/iV.2015.87.
- 1502 143. Lievesley R, Wozencroft M, Ewins D. The Emotiv EPOC neuroheadset: an  
1503 inexpensive method of controlling assistive technologies using facial expressions  
1504 and thoughts? *Journal of Assistive Technologies*. 2011;5(2):67-82. doi:  
1505 [doi.org/10.1108/17549451111149278](https://doi.org/10.1108/17549451111149278).
- 1506 144. Lim WL, Sourina O, Liu Y, Wang L, editors. EEG-based mental workload  
1507 recognition related to multitasking. 2015 10th International Conference on  
1508 Information, Communications and Signal Processing (ICICS); 2015; Singapore,  
1509 Singapore: IEEE. doi: 10.1109/ICICS.2015.7459834.
- 1510 145. Lin JS, Jiang ZY. An EEG-Based BCI System to Facial Action Recognition.  
1511 *Wireless Pers Commun*. 2017;94(3):1579-93. doi: 10.1007/s11277-016-3700-3.  
1512 PubMed PMID: WOS:000401758400070.
- 1513 146. Lin YP, Wang Y, Jung TP. Assessing the feasibility of online SSVEP decoding  
1514 in human walking using a consumer EEG headset. *Journal of Neuroengineering and  
1515 Rehabilitation*. 2014;11:119. Epub 2014/08/12. doi: 10.1186/1743-0003-11-119.  
1516 PubMed PMID: 25108604; PubMed Central PMCID: PMC4245767.
- 1517 147. Liu S, Xi N, Jia Y, editors. On-line operator skill assessment for telerobot  
1518 operation using electroencephalo-graph (eeg). 2012 IEEE International Conference  
1519 on Robotics and Biomimetics (ROBIO); 2012; Guangzhou, China: IEEE. doi:  
1520 10.1109/ROBIO.2012.6491195.

- 1521 148. Liu Y, Sourina O, editors. EEG databases for emotion recognition. 2013  
1522 International Conference on Cyberworlds; 2013; Yokohama, Japan: IEEE. doi:  
1523 10.1109/CW.2013.52.
- 1524 149. Liu Y, Sourina O, editors. EEG-based subject-dependent emotion recognition  
1525 algorithm using fractal dimension. 2014 IEEE International Conference on Systems,  
1526 Man, and Cybernetics (SMC); 2014; San Diego, CA, USA: IEEE. doi:  
1527 10.1109/SMC.2014.6974415.
- 1528 150. Liu Y, Sourina O, Shah E, Chua J, Ivanov K. EEG-based monitoring of the  
1529 focused attention related to athletic performance in shooters. International Journal of  
1530 Psychophysiology. 2018;131(Supplement):S55. doi:  
1531 <http://dx.doi.org/10.1016/j.ijpsycho.2018.07.161>.
- 1532 151. Lu Y, Hu Y, Liu R, Wang H, Asama H, Duan F, editors. The design of  
1533 simulation vehicle system controlled by multichannel EEG based on imaginary  
1534 movements. 2016 35th Chinese Control Conference (CCC); 2016; Chengdu, China:  
1535 IEEE. doi: 10.1109/ChiCC.2016.7554127.
- 1536 152. Ma W, Tran D, Le T, Lin H, Zhou S-M, editors. Using EEG artifacts for BCI  
1537 applications. 2014 International Joint Conference on Neural Networks (IJCNN);  
1538 2014; Beijing, China. doi: 10.1109/IJCNN.2014.6889496.
- 1539 153. Magee R, Givigi S, editors. A genetic algorithm for single-trial P300 detection  
1540 with a low-cost EEG headset. 2015 Annual IEEE Systems Conference (SysCon)  
1541 Proceedings; 2015; Vancouver, BC, Canada: IEEE. doi:  
1542 10.1109/SYSCON.2015.7116757.
- 1543 154. Mahajan R, Bansal D. Real Time EEG Based Cognitive Brain Computer  
1544 Interface for Control Applications via Arduino Interfacing. Procedia Computer  
1545 Science. 2017;115:812-20. doi: doi: 10.1016/j.procs.2017.09.158. PubMed PMID:  
1546 WOS:000426436900099.
- 1547 155. Malik AN, Iqbal J, Tiwana MI, editors. EEG signals classification and  
1548 determination of optimal feature-classifier combination for predicting the movement  
1549 intent of lower limb. 2016 2nd International Conference on Robotics and Artificial  
1550 Intelligence (ICRAI); 2016; Rawalpindi, Pakistan: IEEE. doi:  
1551 10.1109/ICRAI.2016.7791226.
- 1552 156. Martisius I, Damasevicius R. A prototype SSVEP based real time BCI gaming  
1553 system. Computational Intelligence and Neuroscience. 2016;2016:18. doi:  
1554 <http://dx.doi.org/10.1155/2016/3861425>.
- 1555 157. McMahan T, Parberry I, Parsons TD. Evaluating player task engagement and  
1556 arousal using electroencephalography. Procedia Manuf. 2015;3:2303-10. doi:  
1557 <https://doi.org/10.1016/j.promfg.2015.07.376>. PubMed PMID:  
1558 WOS:000383740302058.
- 1559 158. McMahan T, Parberry I, Parsons TD. Modality specific assessment of video  
1560 game player's experience using the Emotiv. Entertainment Computing. 2015;7:1-6.  
1561 doi: <https://doi.org/10.1016/j.entcom.2015.03.001>.
- 1562 159. Meattini R, Scarcia U, Melchiorri C, Belpaeme T, editors. Gestural art: A  
1563 Steady State Visual Evoked Potential (SSVEP) based Brain Computer Interface to  
1564 express intentions through a robotic hand. The 23rd IEEE International Symposium  
1565 on Robot and Human Interactive Communication; 2014; Edinburgh, UK: IEEE. doi:  
1566 10.1109/ROMAN.2014.6926255.
- 1567 160. Mehmood RM, Lee HJ, editors. Toward an analysis of emotion regulation in  
1568 children using late positive potential. 2016 38th Annual International Conference of  
1569 the IEEE Engineering in Medicine and Biology Society (EMBC); 2016; Orlando, FL,  
1570 USA: IEEE. 10.1109/EMBC.2016.7590694.

- 1571 161. Mendoza-Palechor F, Menezes ML, Sant'Anna A, Ortiz-Barrios M, Samara A,  
1572 Galway L. Affective recognition from EEG signals: an integrated data-mining  
1573 approach. *Journal of Ambient Intelligence and Humanized Computing*.  
1574 2019;10(10):3955-74. doi: 10.1007/s12652-018-1065-z. PubMed PMID:  
1575 WOS:000487047400018.
- 1576 162. Mheich A, Guilloton J, Houmani N, editors. Monitoring visual sustained  
1577 attention with a low-cost EEG headset. 2017 Fourth International Conference on  
1578 Advances in Biomedical Engineering (ICABME); 2017; Beirut, Lebanon: IEEE. doi:  
1579 10.1109/ICABME.2017.8167572.
- 1580 163. Mijani AM, Shamsollahi MB, Hassani MS, Jalilpour S, editors. Comparison  
1581 between Single, Dual and Triple Rapid Serial Visual Presentation Paradigms for  
1582 P300 Speller. 2018 IEEE International Conference on Bioinformatics and  
1583 Biomedicine (BIBM); 2018; Madrid, Spain: IEEE. doi: 10.1109/BIBM.2018.8621505.
- 1584 164. Moldovan A-N, Ghergulescu I, Weibelzahl S, Muntean CH, editors. User-  
1585 centered EEG-based multimedia quality assessment. 2013 IEEE International  
1586 Symposium on Broadband Multimedia Systems and Broadcasting (BMSB); 2013;  
1587 London, UK: IEEE. doi: 10.1109/BMSB.2013.6621743.
- 1588 165. Moro R, Berger P, Bielikova M, editors. Towards Adaptive Brain-Computer  
1589 Interfaces: Improving Accuracy of Detection of Event-Related Potentials. 2017 12th  
1590 International Workshop on Semantic and Social Media Adaptation and  
1591 Personalization (SMAP); 2017; Bratislava, Slovakia. doi:  
1592 10.1109/SMAP.2017.8022664.
- 1593 166. Mouli S, Palaniappan R, editors. Hybrid BCI Utilising SSVEP and P300 Event  
1594 Markers for Reliable and Improved Classification Using LED Stimuli. 2017 IEEE  
1595 Symposium on Computer Applications & Industrial Electronics (ISCAIE); 2017;  
1596 Langkawi, Malaysia. doi: 10.1109/ISCAIE.2017.8074963.
- 1597 167. Mulla F, Eya E, Ibrahim E, Alhaddad A, Qahwaji R, Abd-Alhameed R, editors.  
1598 Neurological Assessment of Music Therapy on the Brain using Emotiv Epoc. 2017  
1599 Internet Technologies and Applications (ITA); 2017; Wrexham, UK. doi:  
1600 10.1109/ITECHA.2017.8101950.
- 1601 168. Murugappan M, Murugappan S, Gerard C, editors. Wireless EEG signals  
1602 based neuromarketing system using Fast Fourier Transform (FFT). 2014 IEEE 10th  
1603 International Colloquium on Signal Processing and its Applications; 2014; Kuala  
1604 Lumpur, Malaysia: IEEE. doi: 10.1109/CSPA.2014.6805714.
- 1605 169. Mustafa I, Mustafa I, editors. Smart thoughts: BCI based system  
1606 implementation to detect motor imagery movements. 2018 15th International  
1607 Bhurban Conference on Applied Sciences and Technology (IBCAST); 2018;  
1608 Islamabad, Pakistan: IEEE. doi: 10.1109/IBCAST.2018.8312250.
- 1609 170. Mutasim AK, Bashar MR, Tipu RS, Islam MK, Amin MA, Ieee, editors. Effect  
1610 of Artefact Removal Techniques on EEG Signals for Video Category Classification.  
1611 2018 24th International Conference on Pattern Recognition (ICPR); 2018; Beijing,  
1612 China. doi: 10.1109/ICPR.2018.8545416.
- 1613 171. Nakanishi I, Hattori M, editors. Biometric Potential of Brain Waves Evoked by  
1614 Invisible Visual Stimulation. 2017 International Conference on Biometrics and Kansei  
1615 Engineering (ICBAKE); 2017; Kyoto, Japan. doi: 10.1109/ICBAKE.2017.8090644.
- 1616 172. Nashed NN, Eldawlatly S, Aly GM, editors. A deep learning approach to  
1617 single-trial classification for P300 spellers. 2018 IEEE 4th Middle East Conference  
1618 on Biomedical Engineering (MECBME); 2018; Tunis, Tunisia: IEEE. doi:  
1619 10.1109/MECBME.2018.8402397.

- 1620 173. Neubig T, Sellami L, editors. Recognition of Imagined Speech using  
1621 Electroencephalogram Signals. Smart Biomedical and Physiological Sensor  
1622 Technology XV; 2019. doi: 10.1117/12.2519028.
- 1623 174. Ousterhout T, Dyrholm M, editors. Cortically coupled computer vision with  
1624 emotiv headset using distractor variables. 2013 IEEE 4th International Conference  
1625 on Cognitive Infocommunications (CogInfoCom); 2013; Budapest, Hungary: IEEE.  
1626 doi: 10.1109/CogInfoCom.2013.6719250.
- 1627 175. Ouyang W, Cashion K, Asari VK, editors. Electroencephalograph based brain  
1628 machine interface for controlling a robotic arm. 2013 IEEE Applied Imagery Pattern  
1629 Recognition Workshop (AIPR); 2013; Washington, DC, USA: IEEE. doi:  
1630 10.1109/AIPR.2013.6749312.
- 1631
- 1632 176. Oyama K, Takeuchi A, Chang CK, editors. Brain lattice: Concept lattice-based  
1633 causal analysis of changes in mental workload. 2013 IEEE International Multi-  
1634 Disciplinary Conference on Cognitive Methods in Situation Awareness and Decision  
1635 Support (CogSIMA); 2013; San Diego, CA, USA: IEEE. doi:  
1636 10.1109/CogSIMA.2013.6523824.
- 1637 177. Parmonangan IH, Santoso J, Budiharto W, Gunawan AAS, editors. Fast brain  
1638 control systems for electric wheelchair using support vector machine. First  
1639 International Workshop on Pattern Recognition; 2016; Tokyo, Japan: International  
1640 Society for Optics and Photonics. <https://doi.org/10.1117/12.2243126>.
- 1641 178. Penalzoza CI, Mae Y, Cuellar FF, Kojima M, Arai T. Brain Machine Interface  
1642 System Automation Considering User Preferences and Error Perception Feedback.  
1643 IEEE Trans Autom Sci Eng. 2014;11(4):1275-81. doi: 10.1109/Tase.2014.2339354.  
1644 PubMed PMID: WOS:000343609500028.
- 1645 179. Penalzoza CI, Mae Y, Kojima M, Arai T, editors. BMI-based framework for  
1646 teaching and evaluating robot skills. 2014 IEEE International Conference on  
1647 Robotics and Automation (ICRA); 2014; Hong Kong, China: IEEE. doi:  
1648 10.1109/ICRA.2014.6907749.
- 1649 180. Perakakis M, Potamianos A, editors. Affective evaluation of a mobile  
1650 multimodal dialogue system using brain signals. 2012 IEEE Spoken Language  
1651 Technology Workshop (SLT); 2012; Miami, FL, USA: IEEE. doi:  
1652 10.1109/SLT.2012.6424195.
- 1653 181. Pham TD, Tran D, editors. Emotion recognition using the emotiv epoc device.  
1654 International Conference on Neural Information Processing; 2012; Doha, Qatar:  
1655 Springer. doi: 10.1007/978-3-642-34500-5.
- 1656 182. Phutke S, Jadhav N, Manthalkar R, Joshi Y, editors. Analyzing Effect of  
1657 Meditation Using Higher Order Crossings and Functional Connectivity. 2018  
1658 Computing, Communication and Signal Processing (ICCCSP); 2019. doi:  
1659 <https://doi.org/10.1007/978-981-13-1513-8>.
- 1660 183. Pierguidi L, Guazzini A, Imbimbo E, Righi S, Sorelli M, Bocchi L, editors.  
1661 Validation of a low-cost EEG device in detecting neural correlates of social  
1662 conformity. 2019 41st Annual International Conference of the IEEE Engineering in  
1663 Medicine and Biology Society (EMBC); 2019 2019-Jul; Berlin, Germany. doi:  
1664 10.1109/embc.2019.8856716.
- 1665 184. Pomer-Escher AG, de Souza MDP, Bastos Filho TF, editors. Methodology for  
1666 analysis of stress level based on asymmetry patterns of alpha rhythms in EEG  
1667 signals. 5th ISSNIP-IEEE Biosignals and Biorobotics Conference (2014): Biosignals  
1668 and Robotics for Better and Safer Living (BRC); 2014; Salvador, Brazil: IEEE. doi:  
1669 10.1109/BRC.2014.6880963.

- 1670 185. Poorna S, Baba PS, Ramya GL, Poreddy P, Aashritha L, Nair G, et al.,  
1671 editors. Classification of EEG based control using ANN and KNN—A comparison.  
1672 2016 IEEE International Conference on Computational Intelligence and Computing  
1673 Research (ICCIC); 2016; Chennai, India: IEEE. doi: 10.1109/ICCIC.2016.7919524.
- 1674 186. Prince D, Edmonds M, Sutter A, Cusumano M, Lu W, Asari V, editors. Brain  
1675 machine interface using Emotiv EPOC to control robai cyton robotic arm. 2015  
1676 National Aerospace and Electronics Conference (NAECON); 2015; Dayton, OH,  
1677 USA: IEEE. doi: 10.1109/NAECON.2015.7443080.
- 1678 187. Puzi NM, Jailani R, Norhazman H, Zaini NM, editors. Alpha and Beta  
1679 brainwave characteristics to binaural beat treatment. 2013 IEEE 9th International  
1680 Colloquium on Signal Processing and its Applications; 2013; Kuala Lumpur,  
1681 Malaysia: IEEE. doi: 10.1109/CSPA.2013.6530069.
- 1682 188. Raheel A, Majid M, Anwar SM, editors. Facial Expression Recognition based  
1683 on Electroencephalography. 2019 2nd International Conference on Computing,  
1684 Mathematics and Engineering Technologies (iCoMET); 2019; Sukkur, Pakistan,  
1685 Pakistan. doi: 10.1109/icomet.2019.8673408.
- 1686 189. Rao SN, Prapulla SB, Shobha G, Hariprasad S, Gupta M, Reddy SA, editors.  
1687 Using virtual reality to boost the effectiveness of brain-computer interface  
1688 applications. 2019 4th International Conference on Computational Systems and  
1689 Information Technology for Sustainable Solution (CSITSS); 2019 20-21 Dec. 2019;  
1690 Bengaluru, India, India. doi: 10.1109/CSITSS47250.2019.9031021.
- 1691 190. Reder EE, de Quadros Martins AR, Ferreira VRT, Kalil F, editors. Neural  
1692 Interface Emotiv EPOC and Arduino: Brain-Computer Interaction in a Proof of  
1693 Concept. International Conference on Human-Computer Interaction; 2014: Springer.  
1694 [https://doi.org/10.1007/978-3-319-07230-2\\_58](https://doi.org/10.1007/978-3-319-07230-2_58).
- 1695 191. Ren Z, Qi X, Zhou G, Wang HN. Exploiting the Data Sensitivity of Neurometric  
1696 Fidelity for Optimizing EEG Sensing. *Ieee Internet Things*. 2014;1(3):243-54. doi:  
1697 10.1109/Jiot.2014.2322331. PubMed PMID: WOS:000209672300004.
- 1698 192. Reshmi K, Muhammed PI, Priya V, Akhila V. A Novel Approach to Brain  
1699 Biometric User Recognition. *Procedia Technology*. 2016;25:240-7. doi:  
1700 doi:10.1016/j.protcy.2016.08.103.
- 1701 193. Reyes CE, Rugayan JLC, Jason C, Rullan G, Oppus CM, Tangonan GL,  
1702 editors. A study on ocular and facial muscle artifacts in EEG signals for BCI  
1703 applications. TENCON 2012 IEEE Region 10 Conference; 2012; Cebu, Philippines:  
1704 IEEE. doi: 10.1109/TENCON.2012.6412241.
- 1705 194. Risangtuni AG, Widyotriatmo A, editors. Towards online application of  
1706 wireless EEG-based open platform Brain Computer Interface. 2012 IEEE  
1707 Conference on Control, Systems & Industrial Informatics; 2012; Bandung, Indonesia:  
1708 IEEE. doi: 10.1109/CCSII.2012.6470489.
- 1709 195. Robinson N, Vinod AP, editors. Bi-directional imagined hand movement  
1710 classification using low cost EEG-based BCI. 2015 IEEE International Conference on  
1711 Systems, Man, and Cybernetics; 2015; Kowloon, China: IEEE. doi:  
1712 10.1109/SMC.2015.544.
- 1713 196. Rodriguez A, Rey B, Clemente M, Wrzesien M, Alcaniz M. Assessing brain  
1714 activations associated with emotional regulation during virtual reality mood induction  
1715 procedures. *Expert Systems with Applications*. 2015;42(3):1699-709. doi:  
1716 10.1016/j.eswa.2014.10.006. PubMed PMID: WOS:000345734700056.
- 1717 197. Roh T, Song K, Cho H, Shin D, Ha U, Lee K, et al., editors. A 2.14 mW EEG  
1718 neuro-feedback processor with transcranial electrical stimulation for mental health  
1719 management. 2014 IEEE International Solid-State Circuits Conference Digest of

- 1720 Technical Papers (ISSCC); 2014; San Francisco, CA, USA: IEEE. doi:  
1721 10.1109/ISSCC.2014.6757451.
- 1722 198. Roh T, Song K, Cho H, Shin D, Yoo HJ. A wearable neuro-feedback system  
1723 with EEG-based mental status monitoring and transcranial electrical stimulation.  
1724 IEEE Transactions on Biomedical Circuits and Systems. 2014;8(6):755-64. Epub  
1725 2015/01/15. doi: 10.1109/TBCAS.2014.2384017. PubMed PMID: 25585425.
- 1726 199. Rosas-Cholula G, Ramirez-Cortes JM, Alarcon-Aquino V, Gomez-Gil P,  
1727 Rangel-Magdaleno Jde J, Reyes-Garcia C. Gyroscope-driven mouse pointer with an  
1728 EMOTIV(R) EEG headset and data analysis based on Empirical Mode  
1729 Decomposition. Sensors (Basel). 2013;13(8):10561-83. Epub 2013/08/21. doi:  
1730 10.3390/s130810561. PubMed PMID: 23948873; PubMed Central PMCID:  
1731 PMC3812618.
- 1732 200. Rudas A, Laki S, editors. On Activity Identification Pipelines for a Low-  
1733 Accuracy EEG Device. 2019 18th IEEE International Conference On Machine  
1734 Learning And Applications (ICMLA); 2019; Boca Raton, FL, USA. doi:  
1735 10.1109/ICMLA.2019.00238.
- 1736 201. Saini R, Kaur B, Singh P, Kumar P, Roy PP, Raman B, et al. Don't just sign  
1737 use brain too: A novel multimodal approach for user identification and verification.  
1738 Information Sciences. 2018;430:163-78. doi: 10.1016/j.ins.2017.11.045. PubMed  
1739 PMID: WOS:000424174700011.
- 1740 202. Saitis C, Kalimeri K. Multimodal Classification of Stressful Environments in  
1741 Visually Impaired Mobility Using EEG and Peripheral Biosignals. IEEE Transactions  
1742 on Affective Computing. 2018. doi: 10.1109/TAFFC.2018.2866865.
- 1743 203. Salisbury DB, Parsons TD, Monden KR, Trost Z, Driver SJ. Brain-computer  
1744 interface for individuals after spinal cord injury. Rehabilitation psychology.  
1745 2016;61(4):435. doi: 10.1037/rep0000099.
- 1746 204. Salvador MDV, Carlo RHB, Joel SMJC, Paolo TQV, Tungala KL, Prado SV,  
1747 editors. Correlation of emotion to film rating classification using EEG signal analysis.  
1748 2017 International Electrical Engineering Congress (iEECON); 2017; Pattaya,  
1749 Thailand: IEEE. doi: 10.1109/IEECON.2017.8075866.
- 1750 205. Salvato M, Benatti S, Kartsch V, Guermandi M, Benini L. A Minimally Invasive  
1751 Low-Power Platform for Real-Time Brain Computer Interaction based on Canonical  
1752 Correlation Analysis. IEEE Internet Things. 2018;6(1):967-77. doi:  
1753 10.1109/JIOT.2018.2866341.
- 1754 206. Samadi H, Daliri MR, editors. Solve the Rubik's cube with robot based on  
1755 non-invasive brain computer interface. 2014 Iranian Conference on Intelligent  
1756 Systems (ICIS); 2014; Bam, Iran: IEEE. doi: 10.1109/IranianCIS.2014.6802558.
- 1757 207. Samadi MRH, Cooke N, editors. EEG signal processing for eye tracking. 2014  
1758 22nd European Signal Processing Conference (EUSIPCO); 2014; Lisbon, Portugal:  
1759 IEEE. Retrieved from: <https://ieeexplore.ieee.org/abstract/document/6952746>.
- 1760 208. Sayegh F, Fadhli F, Karam F, BoAbbas M, Mahmeed F, Korbane JA, et al.,  
1761 editors. A Wearable Rehabilitation Device for Paralysis. 2017 2nd International  
1762 Conference on Bio-engineering for Smart Technologies (BioSMART); 2017; Paris,  
1763 France. doi: 10.1109/BIOSMART.2017.8095334.
- 1764 209. Schiatti L, Faes L, Tessadori J, Barresi G, Mattos L, editors. Mutual  
1765 information-based feature selection for low-cost BCIs based on motor imagery. 2016  
1766 38th Annual International Conference of the IEEE Engineering in Medicine and  
1767 Biology Society (EMBC); 2016 Aug; Orlando, FL, USA. doi:  
1768 10.1109/EMBC.2016.7591305.

- 1769 210. Schreiber MA, Trkov M, Merryweather A, editors. Influence of Frequency  
1770 Bands in EEG Signal to Predict User Intent. 2019 9th International IEEE/EMBS  
1771 Conference on Neural Engineering (NER); 2019 20-23 March 2019; San Francisco,  
1772 CA, USA. doi: 10.1109/NER.2019.8716947.
- 1773 211. Schwarz J, Fuchs S, editors. Test-Retest Stability of EEG and Eye Tracking  
1774 Metrics as Indicators of Variations in User State—An Analysis at a Group and an  
1775 Individual Level. International Conference on Neuroergonomics and Cognitive  
1776 Engineering; 2016; Orlando, FL, USA: Springer International Publishing. doi:  
1777 10.1007/978-3-319-41691-5.
- 1778 212. Seco GBS, Gerhardt GJL, Biazotti AA, Molan AL, Schonwald SV, Rybarczyk-  
1779 Filho JL. EEG alpha rhythm detection on a portable device. Biomedical Signal  
1780 Processing and Control. 2019;52:97-102. doi: 10.1016/j.bspc.2019.03.014. PubMed  
1781 PMID: WOS:000473381100010.
- 1782 213. Sequeira S, Diogo C, Ferreira FJ, editors. EEG-signals based control strategy  
1783 for prosthetic drive systems. 2013 IEEE 3rd Portuguese Meeting in Bioengineering  
1784 (ENBENG); 2013; Braga, Portugal: IEEE. doi: 10.1109/ENBENG.2013.6518399.
- 1785 214. Serhani MA, El Menshawy M, Benharref A, Navaz AN, editors. Real time EEG  
1786 compression for energy-aware continuous mobile monitoring. 2015 27th International  
1787 Conference on Microelectronics (ICM); 2015; Casablanca, Morocco: IEEE. doi:  
1788 10.1109/ICM.2015.7438046.
- 1789 215. Shah MA, Sheikh AA, Sajjad AM, Uppal M, editors. A Hybrid Training-Less  
1790 Brain-Machine Interface Using SSVEP and EMG Signal. 2015 13th International  
1791 Conference on Frontiers of Information Technology (FIT); 2015; Islamabad,  
1792 Pakistan: IEEE. doi: 10.1109/FIT.2015.26.
- 1793 216. Shahin MK, Tharwat A, Gaber T, Hassanien AE. A Wheelchair Control  
1794 System Using Human-Machine Interaction: Single-Modal and Multimodal  
1795 Approaches. Journal of Intelligent Systems. 2019;28(1):115-32. doi: 10.1515/jisys-  
1796 2017-0085. PubMed PMID: WOS:000455277600009.
- 1797 217. Shankar S, Verma A, Rai R, editors. Creating by Imagining: Use of Natural  
1798 and Intuitive BCI in 3D CAD Modeling. ASME 2013 International Design Engineering  
1799 Technical Conferences and Computers and Information in Engineering Conference;  
1800 2013; Portland, OR, USA: American Society of Mechanical Engineers.
- 1801 218. Shankar SS, Rai R. Human factors study on the usage of BCI headset for 3D  
1802 CAD modeling. Computer-Aided Design. 2014;54:51-5. doi:  
1803 10.1016/j.cad.2014.01.006. PubMed PMID: WOS:000338604400005.
- 1804 219. Shedeed HA, Issa MF, El-Sayed SM, editors. Brain EEG signal processing for  
1805 controlling a robotic arm. 2013 8th International Conference on Computer  
1806 Engineering & Systems (ICCES); 2013; Cairo, Egypt. doi:  
1807 10.1109/ICCES.2013.6707191.
- 1808 220. Shi M, Liu X, Zhou C, Chao F, Liu C, Jiao X, et al., editors. Towards portable  
1809 SSVEP-based brain-computer interface using Emotiv EPOC and mobile phone.  
1810 2018 Tenth International Conference on Advanced Computational Intelligence  
1811 (ICACI); 2018; Xiamen, China: IEEE. doi: 10.1109/ICACI.2018.8377615.
- 1812 221. Shiqi Z, Xiaoxin C, Yuanning F, Chenglong Z, Dunshan Y, editors. Binary  
1813 Convolutional Neural Network for Brain Computer Interfaces. 2019 China  
1814 Semiconductor Technology International Conference (CSTIC); 2019 2019.  
1815 10.1109/cstic.2019.8755742.
- 1816 222. Sinharay A, Chatterjee D, Pal A, editors. Cognitive Load Detection on  
1817 Commercial EEG Devices: An Optimized Signal Processing Chain. First International



- 1818 Conference on Cognitive Internet of Things Technologies 2015; Rome, Italy:  
1819 Springer. doi: 10.1007/978-3-319-19656-5.
- 1820 223. Sinharay A, Chatterjee D, Sinha A, editors. Evaluation of different onscreen  
1821 keyboard layouts using EEG signals. 2013 IEEE International Conference on  
1822 Systems, Man, and Cybernetics; 2013; Manchester, UK: IEEE. doi:  
1823 10.1109/SMC.2013.88.
- 1824 224. Soman S, Murthy B. Using Brain Computer Interface for Synthesized Speech  
1825 Communication for the Physically Disabled. *Procedia Computer Science*.  
1826 2015;46:292-8. doi: 10.1016/j.procs.2015.02.023.
- 1827 225. Sourina O, Liu Y, Nguyen MK, Wang Q. Neurofeedback systems and  
1828 emotions monitoring. *International Journal of Psychophysiology*. 2012;85(3):345-  
1829 doi: 10.1016/j.ijpsycho.2012.06.148. PubMed PMID: WOS:000308784300147.
- 1830 226. Stein A, Yotam Y, Puzis R, Shani G, Taieb-Maimon M. EEG-triggered  
1831 dynamic difficulty adjustment for multiplayer games. *Entertainment Computing*.  
1832 2018;25:14-25. doi: 10.1016/j.entcom.2017.11.003. PubMed PMID:  
1833 WOS:000425850100002.
- 1834 227. Stock VN, Balbinot A, editors. Movement imagery classification in EMOTIV  
1835 cap based system by Naive Bayes. 2016 38th Annual International Conference of  
1836 the IEEE Engineering in Medicine and Biology Society (EMBC); 2016 Aug; Orlando,  
1837 FL, USA. doi: 10.1109/EMBC.2016.7591711.
- 1838 228. Stoica A, editor *Multimind: Multi-brain signal fusion to exceed the power of a*  
1839 *single brain*. 2012 Third International Conference on Emerging Security  
1840 Technologies; 2012; Lisbon, Portugal: IEEE. doi: 10.1109/EST.2012.47.
- 1841 229. Sunny TD, Aparna T, Neethu P, Venkateswaran J, Vishnupriya V, Vyas PS.  
1842 *Robotic Arm with Brain – Computer Interfacing*. International Conference on  
1843 Emerging Trends in Engineering, Science and Technology. 2016;24:1089-96. doi:  
1844 10.1016/j.protcy.2016.05.241. PubMed PMID: WOS:000387696400142.
- 1845 230. Suprijanto x, Rezi MH, Widyotriatmo A, Turnip A, editors. Evaluation of  
1846 stimulation scheme for mu rhythm based-Brain computer interface user. 2013 3rd  
1847 International Conference on Instrumentation Control and Automation (ICA); 2013;  
1848 Ungasan, Indonesia: IEEE. doi: 10.1109/ICA.2013.6734041.
- 1849 231. Swansi V, Herradura T, Suarez MT, editors. Analyzing Novice Programmers'  
1850 EEG Signals using Unsupervised Algorithms. 25th International Conference on  
1851 Computers in Education; 2017; New Zealand.
- 1852 232. Swee SK, Kiang KDT, You LZ, editors. EEG Controlled Wheelchair. 2016  
1853 International Conference on Mechanical, Manufacturing, Modeling and Mechatronics  
1854 (IC4M 2016); 2016: EDP Sciences.  
1855 <https://doi.org/10.1051/mateconf/20165102011>.
- 1856 233. Swee SK, You LZ, Kiang KT, editors. Brainwave Controlled Electrical  
1857 Wheelchair. 2016 7th International Conference on Mechanical, Industrial, and  
1858 Manufacturing Technologies (MIMT 2016); 2016. doi:  
1859 10.1051/mateconf/20165403005.
- 1860 234. Szajerman D, Warycha M, Antonik A, Wojciechowski A, editors. Popular Brain  
1861 Computer Interfaces for Game Mechanics Control. 10th International Conference on  
1862 Multimedia and Network Information Systems (MISSI); 2017; Warsaw, Poland:  
1863 Springer. doi: 10.1007/978-3-319-43982-2.
- 1864 235. Szalowski A, Picovici D, editors. Investigating colour's effect in stimulating  
1865 brain oscillations for BCI systems. 2016 4th International Winter Conference on  
1866 Brain-Computer Interface (BCI); 2016; Yongpyong, South Korea. doi: 10.1109/IWW-  
1867 BCI.2016.7457449.

- 1868 236. Szalowski A, Picovici D, editors. Testing performance of multicolour  
1869 checkerboard flickers against their greyscale versions for SSVEP-based BCI. 2019  
1870 7th International Winter Conference on Brain-Computer Interface; 2019.  
1871 10.1109/iww-bci.2019.8737261.  
1872
- 1873 237. Szegletes L, Forstner B, editors. Reusable framework for the development of  
1874 adaptive games. 2013 IEEE 4th International Conference on Cognitive  
1875 Infocommunications (CogInfoCom); 2013; Budapest, Hungary: IEEE. doi:  
1876 10.1109/CogInfoCom.2013.6719173.
- 1877 238. Taher FB, Amor NB, Jallouli M, editors. EEG control of an electric wheelchair  
1878 for disabled persons. 2013 International Conference on Individual and Collective  
1879 Behaviors in Robotics (ICBR); 2013; Sousse, Tunisia: IEEE. doi:  
1880 10.1109/ICBR.2013.6729275.
- 1881 239. Thomas KP, Vinod AP, Guan C, editors. Evaluation of EEG features during  
1882 overt visual attention during neurofeedback game. 2014 IEEE International  
1883 Conference on Systems, Man, and Cybernetics (SMC); 2014; San Diego, CA, USA:  
1884 IEEE. doi: 10.1109/SMC.2014.6974188.
- 1885 240. Tjandrasa H, Djanali S, editors. Classification of P300 event-related potentials  
1886 using wavelet transform, MLP, and soft margin SVM. 2018 Tenth International  
1887 Conference on Advanced Computational Intelligence (ICACI); 2018; Xiamen, China:  
1888 IEEE. doi: 10.1109/ICACI.2018.8377481.
- 1889 241. Tjandrasa H, Djanali S, Arunanto FX, editors. Classification of P300 in EEG  
1890 Signals for Disable Subjects Using Singular Spectrum Analysis. 2017 International  
1891 Conference on Intelligent Informatics and Biomedical Sciences (ICIIBMS); 2017;  
1892 Okinawa, Japan. doi: 10.1109/ICIIBMS.2017.8279747.
- 1893 242. Tobing TAML, Prawito, Wijaya SK, editors. Classification of Right-Hand Grasp  
1894 Movement Based on EMOTIV Epc. International Symposium on Current Progress  
1895 in Mathematics and Sciences; 2017. doi: 10.1063/1.4991173.
- 1896 243. Trevisan DG, Reis IMBP, Moran MBH, Salgado LCD, editors. Evaluating the  
1897 User Experience of Adult Users in Pokemon GO game. 2017 19th Symposium on  
1898 Virtual and Augmented Reality (SVR); 2017; Curitiba, Brazil. doi:  
1899 10.1109/Svr.2017.29.
- 1900 244. Trigui O, Zouch W, Messaoud MB, editors. A comparison study of SSVEP  
1901 detection methods using the Emotiv Epc headset. 2015 16th International  
1902 Conference on Sciences and Techniques of Automatic Control and Computer  
1903 Engineering (STA); 2015; Monastir, Tunisia: IEEE. doi: 10.1109/STA.2015.7505108.
- 1904 245. Vargic R, Chlebo M, Kacur J, editors. Human computer interaction using BCI  
1905 based on sensorimotor rhythm. 2015 IEEE 19th International Conference on  
1906 Intelligent Engineering Systems (INES); 2015; Bratislava, Slovakia: IEEE. doi:  
1907 10.1109/INES.2015.7329645.
- 1908 246. Vega IM, Adarve CA, Villar-Vega HF, Paramo CA. Serious game for real-time  
1909 brain-computer interface training. Journal of Physics: Conference Series.  
1910 2019;1418:012011. doi: 10.1088/1742-6596/1418/1/012011. PubMed PMID:  
1911 INSPEC:19310023.
- 1912 247. Vidugiriene A, Vaskevicius E, Kaminskas V, editors. Modeling of affective  
1913 state response to a virtual 3D face. 2013 European Modelling Symposium; 2013;  
1914 Manchester, UK: IEEE. doi: 10.1109/EMS.2013.31.
- 1915 248. Vourvopoulos A, Liarokapis F. Evaluation of commercial brain-computer  
1916 interfaces in real and virtual world environment: A pilot study. Computers & Electrical

- 1917 Engineering. 2014;40(2):714-29. doi: 10.1016/j.compeleceng.2013.10.009. PubMed  
1918 PMID: WOS:000334978500037.
- 1919 249. Wang S, Gwizdka J, Chaovalitwongse WA. Using Wireless EEG Signals to  
1920 Assess Memory Workload in the n-Back Task. *IEEE Transactions on Human-*  
1921 *Machine Systems*. 2016;46(3):424-35. doi: 10.1109/THMS.2015.2476818.
- 1922 250. Wang S, Yu Y-C, Jouny I, Gabel L, editors. Development of assistive  
1923 technology devices using an EEG headset. 2013 39th Annual Northeast  
1924 Bioengineering Conference; 2013; Syracuse, NY, USA: IEEE. doi:  
1925 10.1109/NEBEC.2013.169.
- 1926 251. Wang Y, Markham C, Deegan C, editors. Assessing the time synchronisation  
1927 of EEG systems. 2019 30th Irish Signals and Systems Conference (ISSC); 2019 17-  
1928 18 June 2019; Maynooth, Ireland. doi: 10.1109/ISSC.2019.8904947.
- 1929 252. Wiederhold B, Riva G. Measuring presence during the navigation in a virtual  
1930 environment using EEG. *Annual Review of Cybertherapy and Telemedicine*.  
1931 2013;191:136. doi: 10.323/978-1-61499-282-0-136.
- 1932 253. Wijayasekara D, Manic M, editors. Human machine interaction via brain  
1933 activity monitoring. 2013 6th International Conference on Human System  
1934 Interactions (HSI); 2013; Sopot, Poland: IEEE. doi: 10.1109/HSI.2013.6577809.
- 1935 254. Williams G, Lee YS, Ekanayake S, Pathirana PN, Andriske L, editors.  
1936 Facilitating communication and computer use with EEG devices for non-vocal  
1937 quadriplegics. 7th International Conference on Information and Automation for  
1938 Sustainability; 2014; Colombo, Sri Lanka: IEEE. doi: 10.1109/ICIAFS.2014.7069604.
- 1939 255. Wu D, editor Active semi-supervised transfer learning (ASTL) for offline BCI  
1940 calibration. 2017 IEEE International Conference on Systems, Man, and Cybernetics  
1941 (SMC); 2017; Banff, AB, Canada: IEEE. doi: 10.1109/SMC.2017.8122610.
- 1942 256. Wu D, Lawhern VJ, Hairston WD, Lance BJ. Switching EEG Headsets Made  
1943 Easy: Reducing Offline Calibration Effort Using Active Weighted Adaptation  
1944 Regularization. *Ieee T Neur Sys Reh*. 2016;24(11):1125-37. doi:  
1945 10.1109/Tnsre.2016.2544108. PubMed PMID: WOS:000389345500001.
- 1946 257. Wu DR. Online and Offline Domain Adaptation for Reducing BCI Calibration  
1947 Effort. *IEEE Transactions on Human-Machine Systems*. 2017;47(4):550-63. doi:  
1948 10.1109/Thms.2016.2608931. PubMed PMID: WOS:000405732000011.
- 1949 258. Xu H, Plataniotis KN, editors. Affect recognition using EEG signal. 2012 IEEE  
1950 14th International Workshop on Multimedia Signal Processing (MMSP); 2012; Banff,  
1951 AB, Canada: IEEE. doi: 10.1109/MMSP.2012.6343458.
- 1952 259. Yaomane K, Pan-ngum S, Ayuthaya PIN, editors. Brain signal detection  
1953 methodology for attention training using minimal EEG channels. 2012 Tenth  
1954 International Conference on ICT and Knowledge Engineering; 2012; Bangkok,  
1955 Thailand: IEEE. doi: 10.1109/ICTKE.2012.6408576.
- 1956 260. Yehia AG, Eldawlatly S, Taher M, editors. WeBB: A Brain-Computer Interface  
1957 Web Browser Based on Steady-State Visual Evoked Potentials. 2017 12th  
1958 International Conference on Computer Engineering and Systems (ICCES); 2017;  
1959 Cairo, Egypt. doi: 10.1109/ICCES.2017.8275277.
- 1960 261. Younis H, Ramzan F, Khan J, Khan MUG, editors. Wheelchair Training Virtual  
1961 Environment for People with Physical and Cognitive Disabilities. 2019 15th  
1962 International Conference on Emerging Technologies (ICET); 2019 2-3 Dec. 2019;  
1963 Peshawar, Pakistan. doi: 10.1109/ICET48972.2019.8994550.
- 1964 262. Yu JH, Sim KB. Classification of color imagination using Emotiv EPOC and  
1965 event-related potential in electroencephalogram. *Optik*. 2016;127(20):9711-8. doi:  
1966 10.1016/j.jileo.2016.07.074. PubMed PMID: WOS:000394632900065.

- 1967 263. Yurdem B, Akpınar B, Ozkurt A, editors. EEG Data Acquisition and Analysis  
1968 for Human Emotions. 2019 11th International Conference on Electrical and  
1969 Electronics Engineering (ELECO); 2019 28-30 Nov. 2019; Bursa, Turkey.  
1970 10.23919/ELECO47770.2019.8990539.  
1971  
1972 264. Zgallai W, Brown JT, Ibrahim A, Mahmood F, Mohammad K, Khalfan M, et al.,  
1973 editors. Deep Learning AI Application to an EEG Driven BCI Smart Wheelchair. 2019  
1974 Advances in Science and Engineering Technology International Conferences  
1975 (ASET); 2019; Dubai, United Arab Emirates. doi: 10.1109/icaset.2019.8714373.  
1976 265. Zhang M, Zhang J, Zhang D, editors. ATVR: An Attention Training System  
1977 using Multitasking and Neurofeedback on Virtual Reality Platform. 2019 IEEE  
1978 International Conference on Artificial Intelligence and Virtual Reality (AIVR); 2019;  
1979 San Diego, CA, USA. 10.1109/AIVR46125.2019.00032.  
1980 266. Zhao Y, Wang Z, Liu J, Chen L, Meng G, Qi H, et al., editors. The research on  
1981 cross-platform transplantation of generic model on subject-independent BCI. 2015  
1982 IEEE 7th International Conference on Awareness Science and Technology (iCAST);  
1983 2015; Qinhuangdao, China: IEEE. doi: 10.1109/ICAwST.2015.7314045.  
1984 267. Zhou Y, Xu T, Cai Y, Wu X, Dong B, editors. Monitoring Cognitive Workload in  
1985 Online Videos Learning Through an EEG-Based Brain-Computer Interface.  
1986 International Conference on Learning and Collaboration Technologies; 2017;  
1987 Vancouver, BC, Canada: Springer International Publishing. doi: 10.1007/978-3-319-  
1988 58509-3.

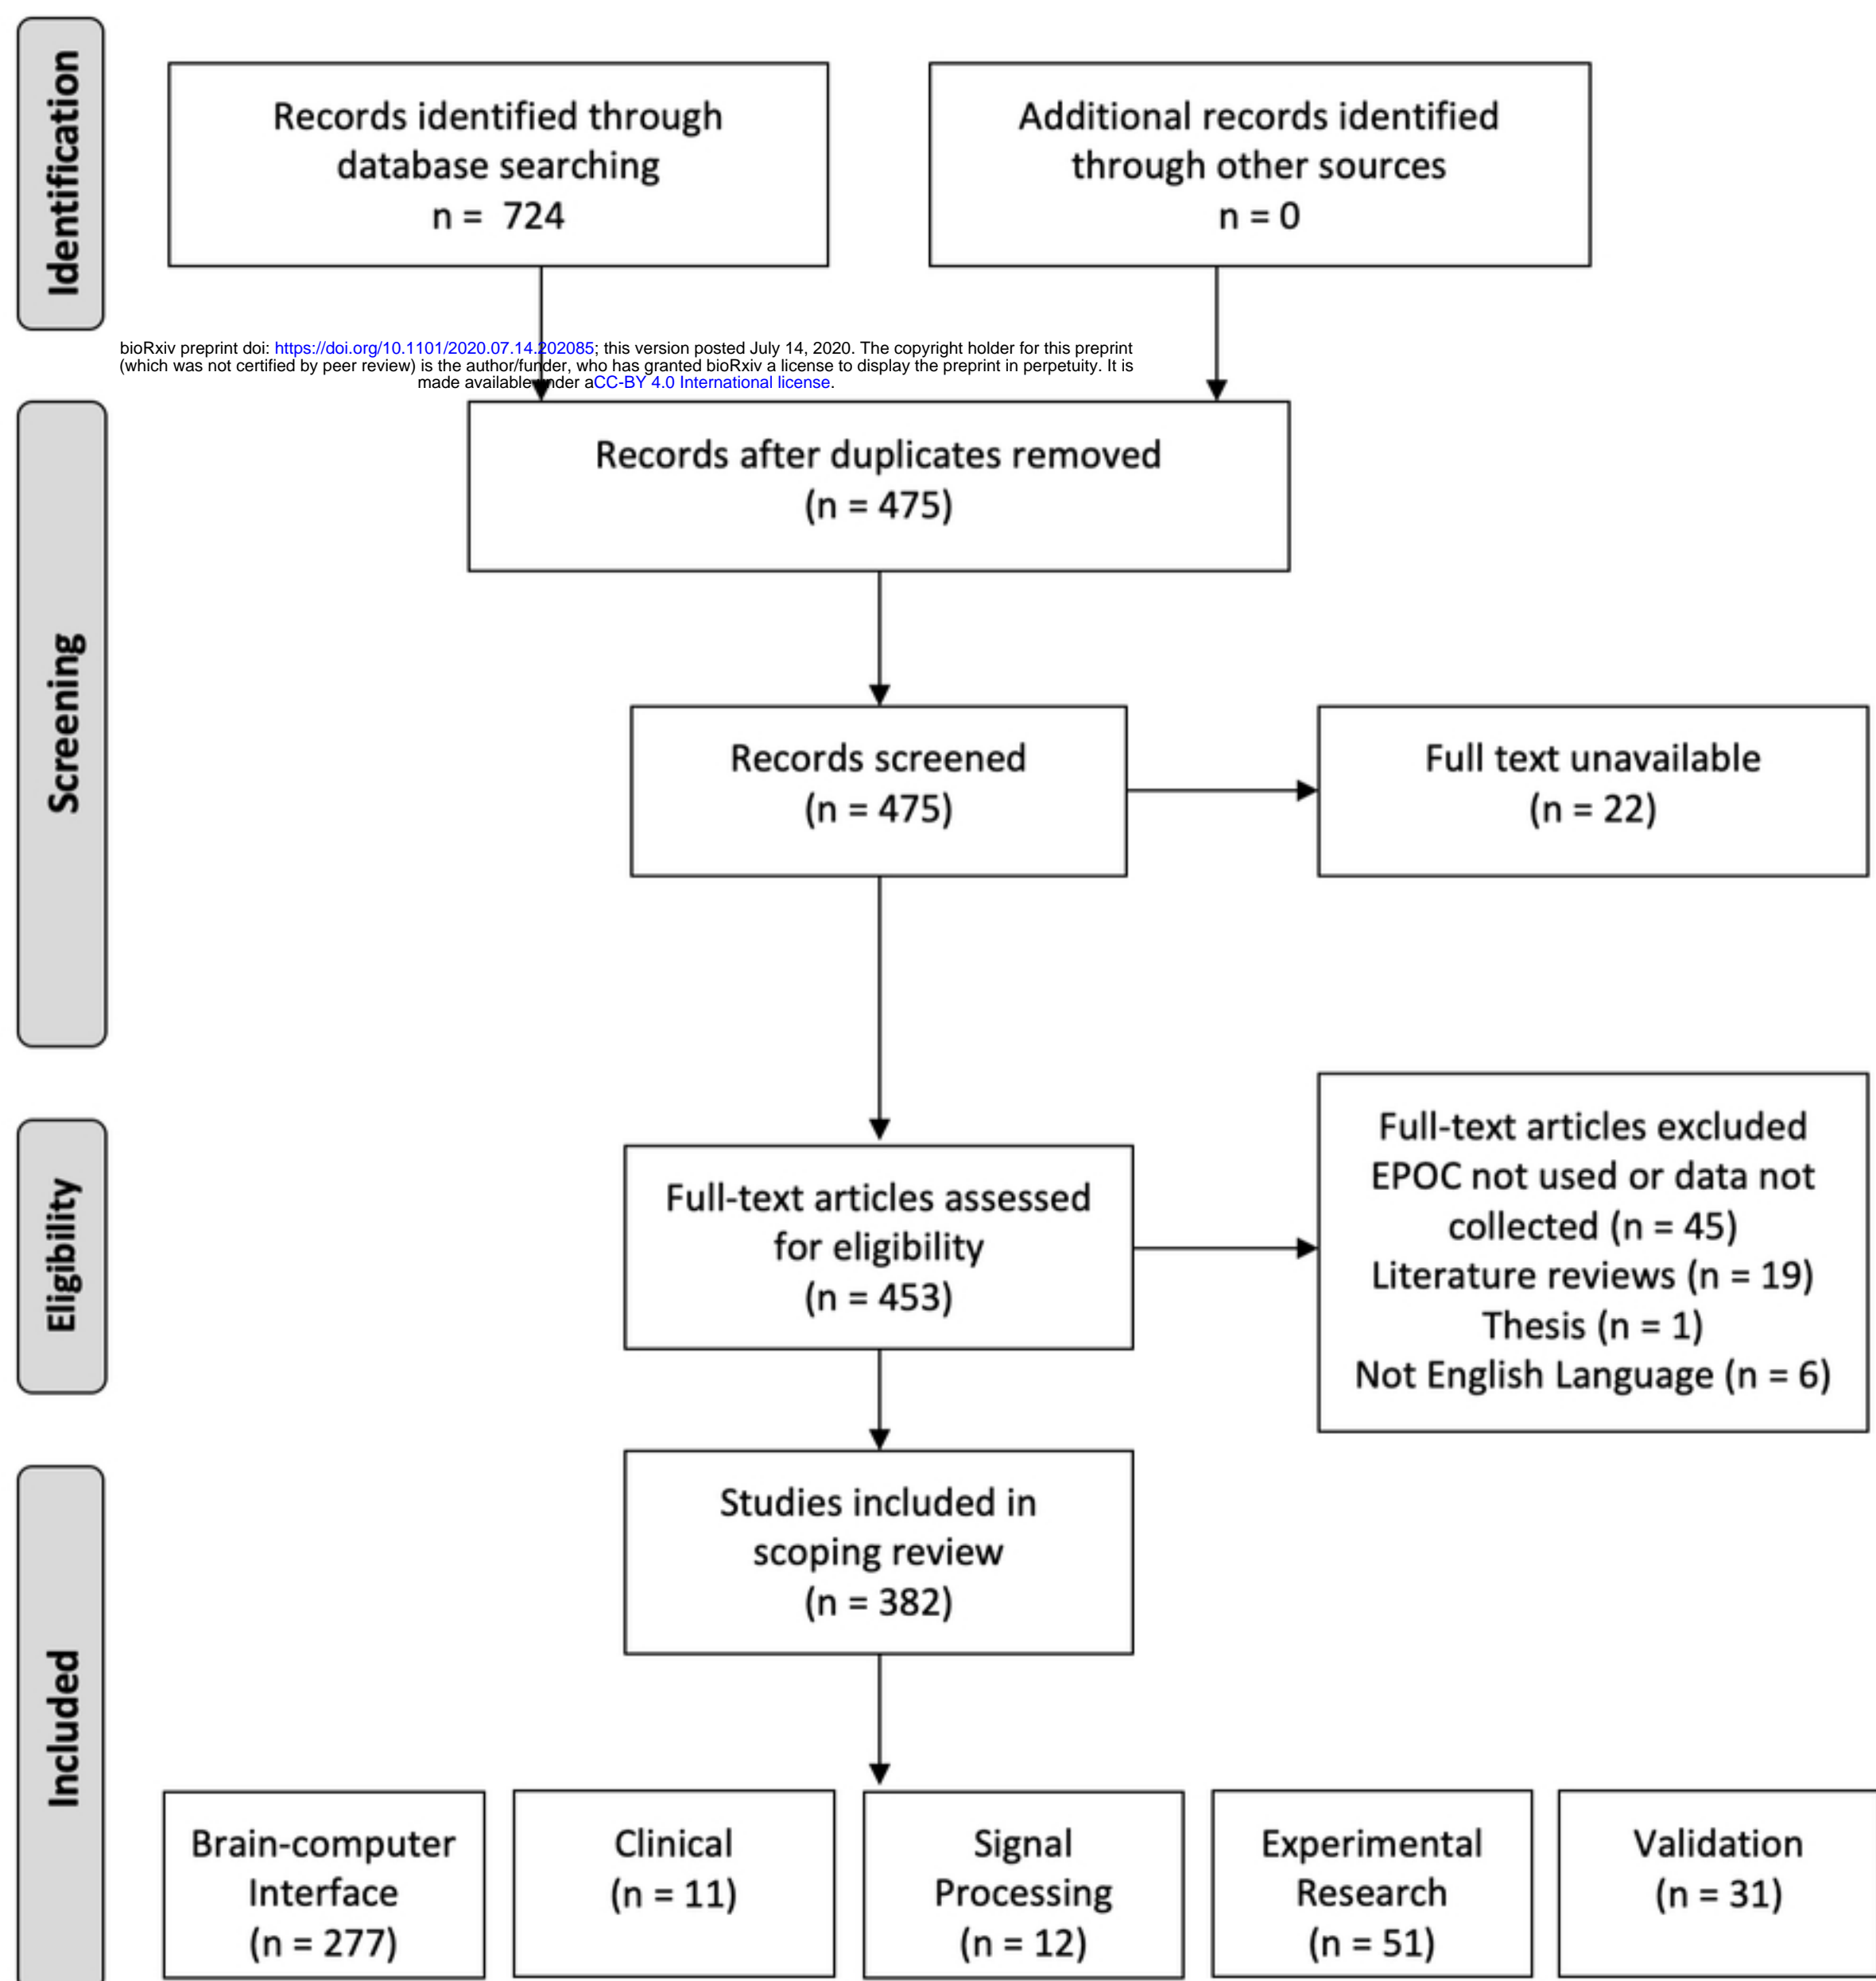

Figure 1

Publication type ■ Conference ■ Journal

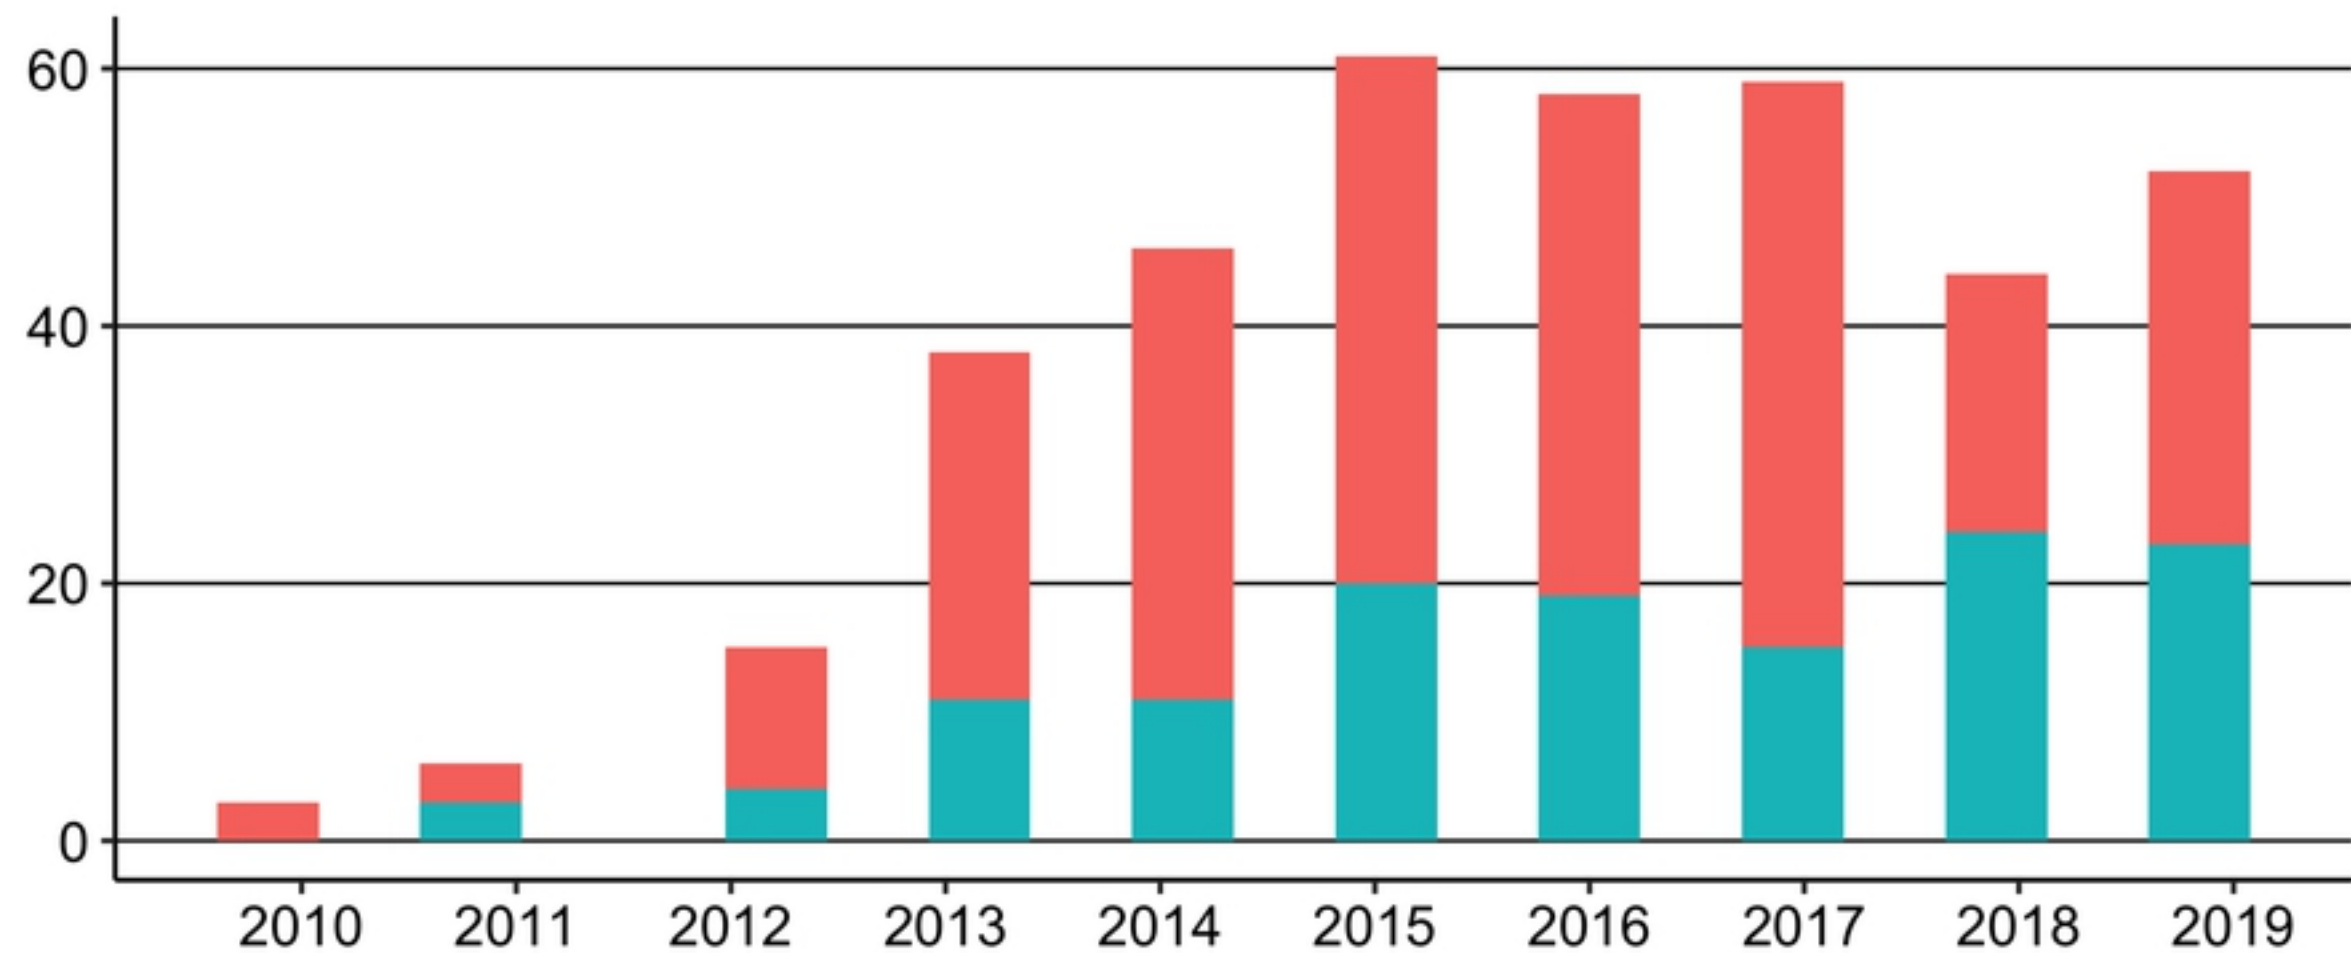

Figure 2

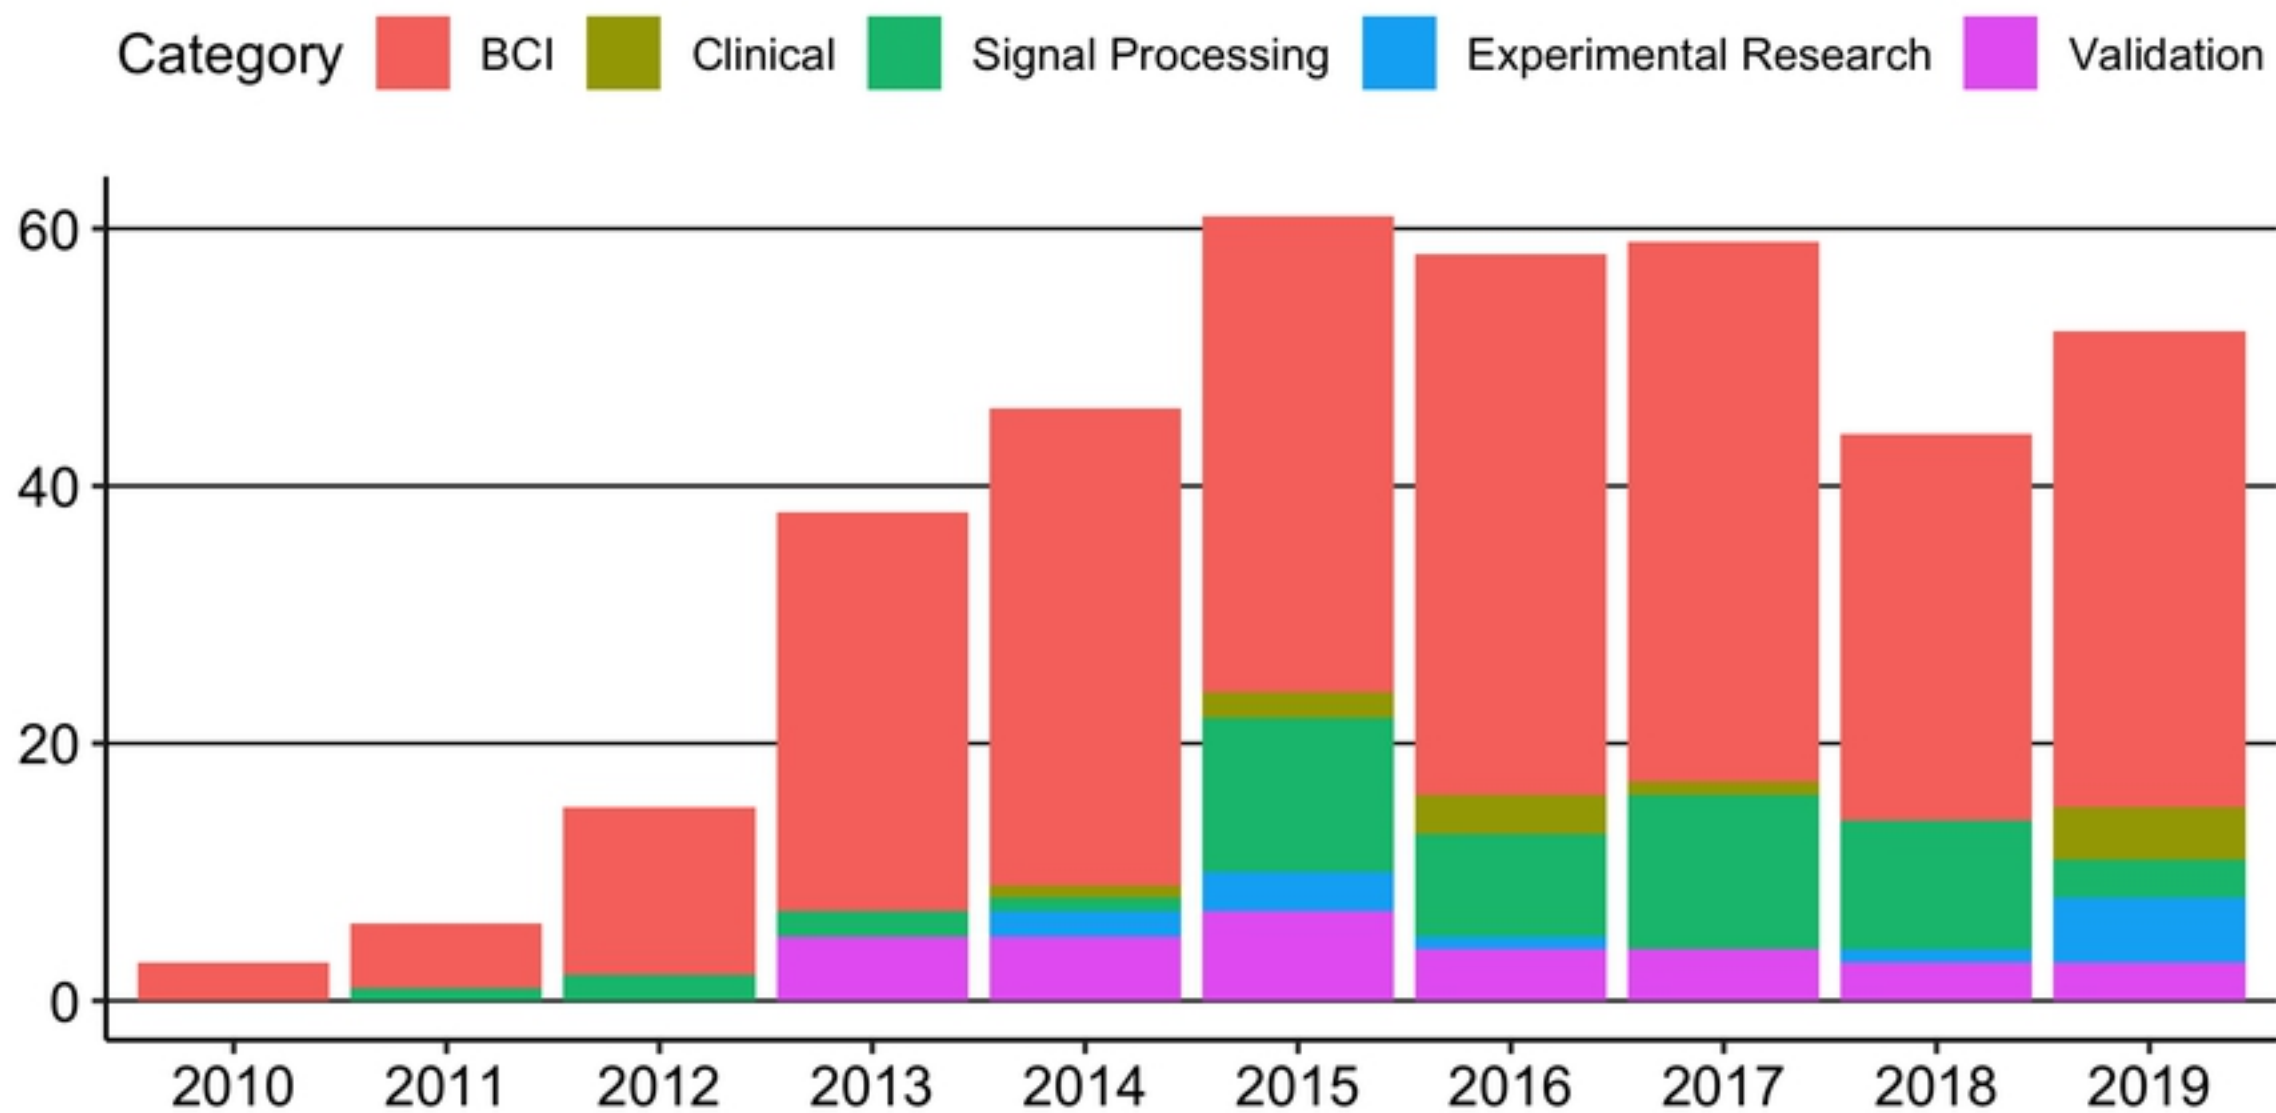

Figure 3

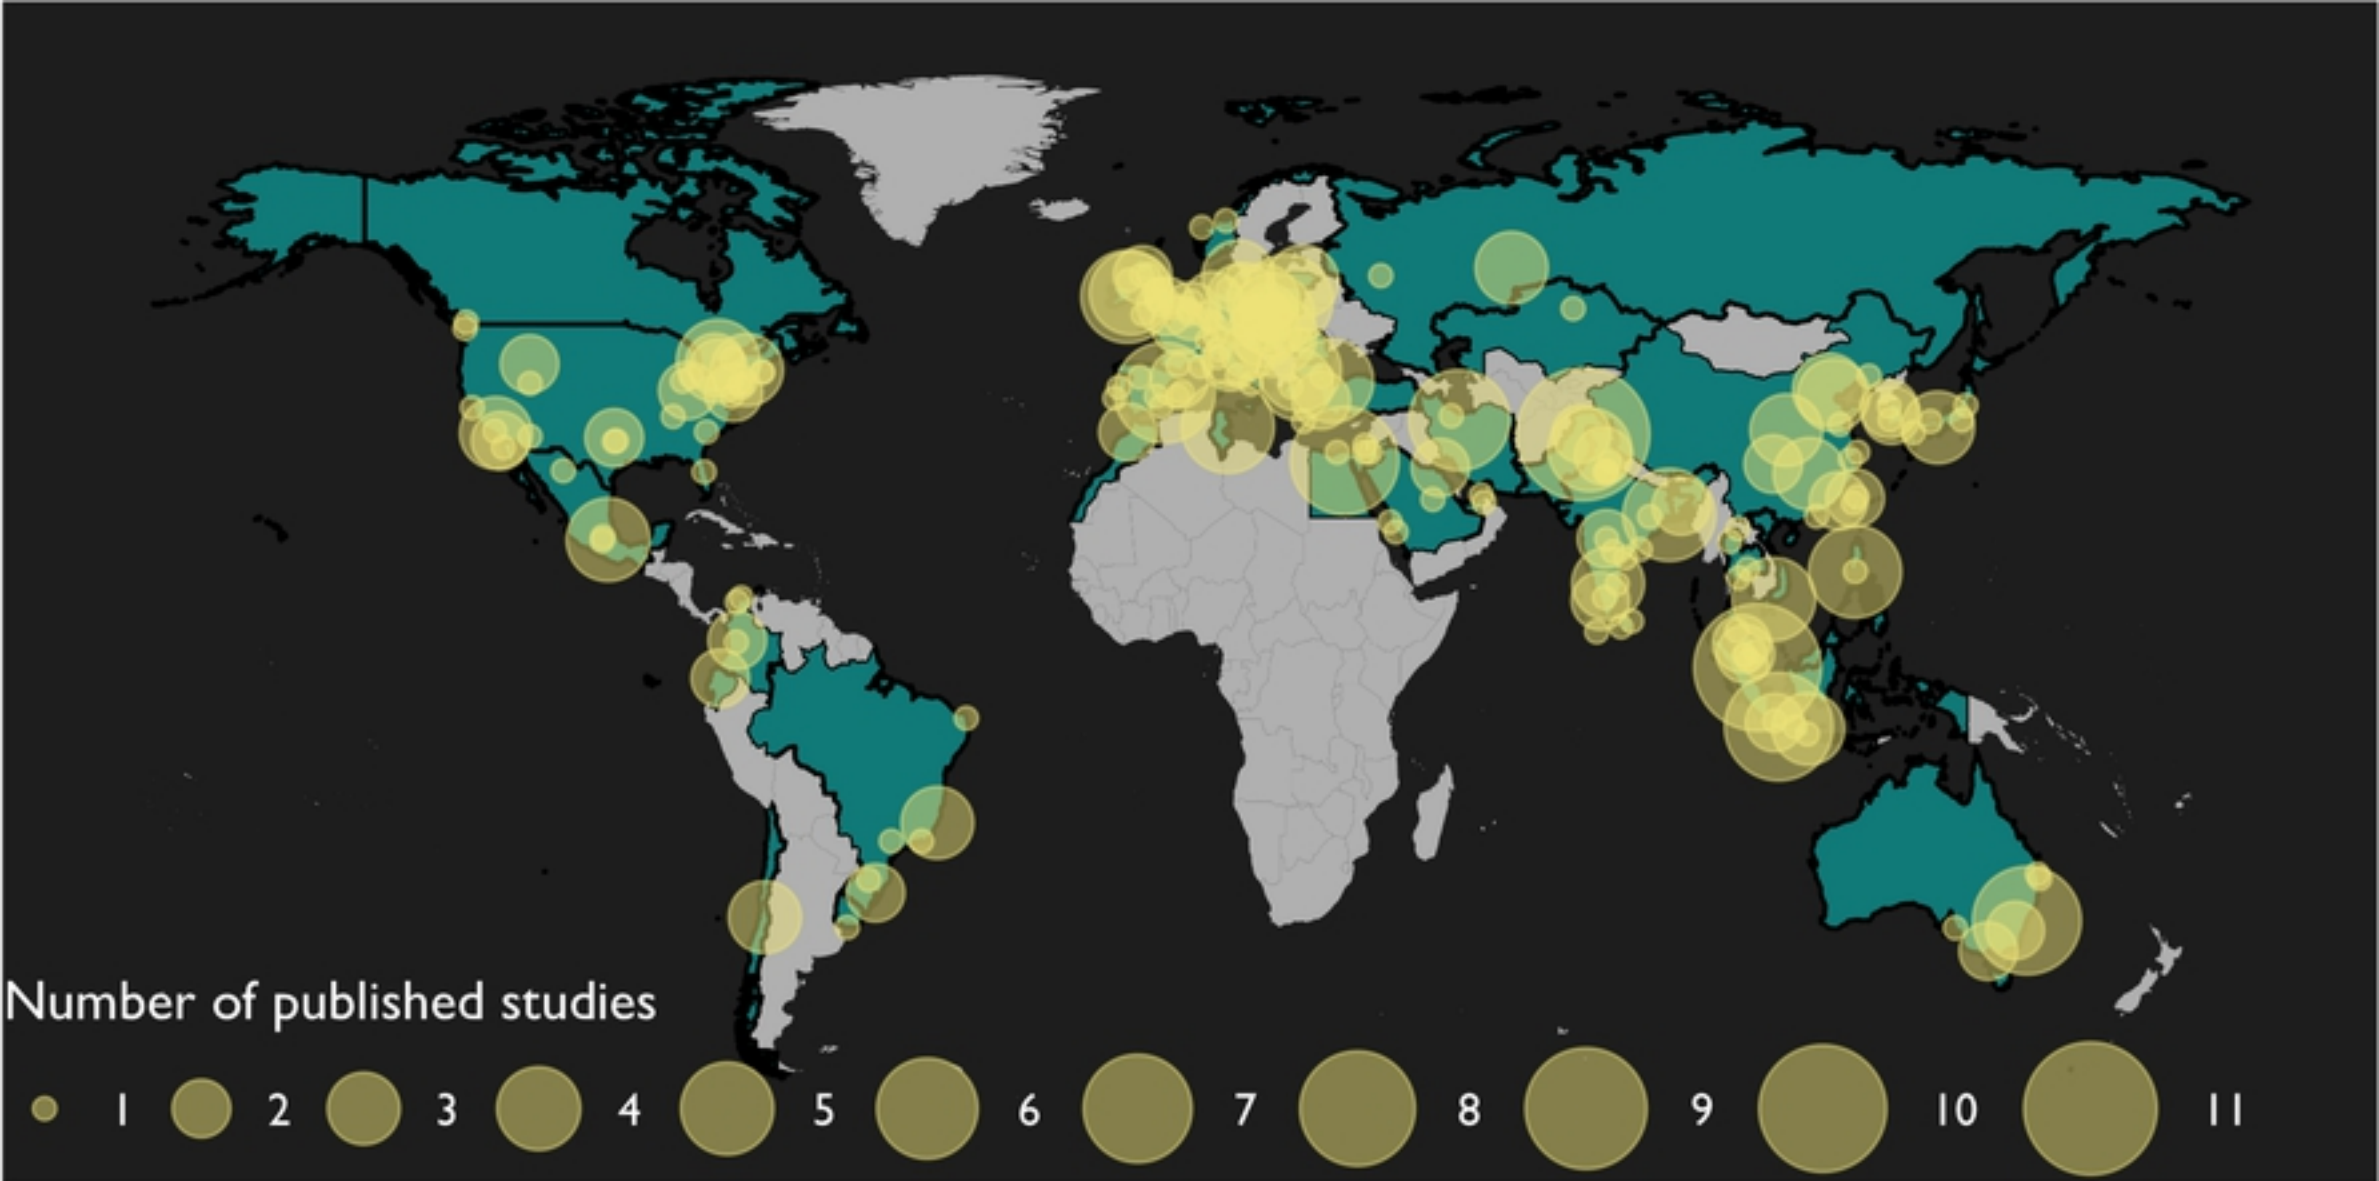

Figure 4
